# Supplementary material for: Three month inhalation exposure to low-level PM2.5 induced brain toxicity in an Alzheimer’s disease mouse model
Source: PubMed Central journal article supplement (PMC8389369; doi:10.1371/journal.pone.0254587), 2021-08-26
Supplement: pone.0254587.s001.pdf [file pone.0254587.s001.pdf]

**S1 File. The supplementary figures (S1-S7),  
tables (S1-S2), and raw western blot images.**

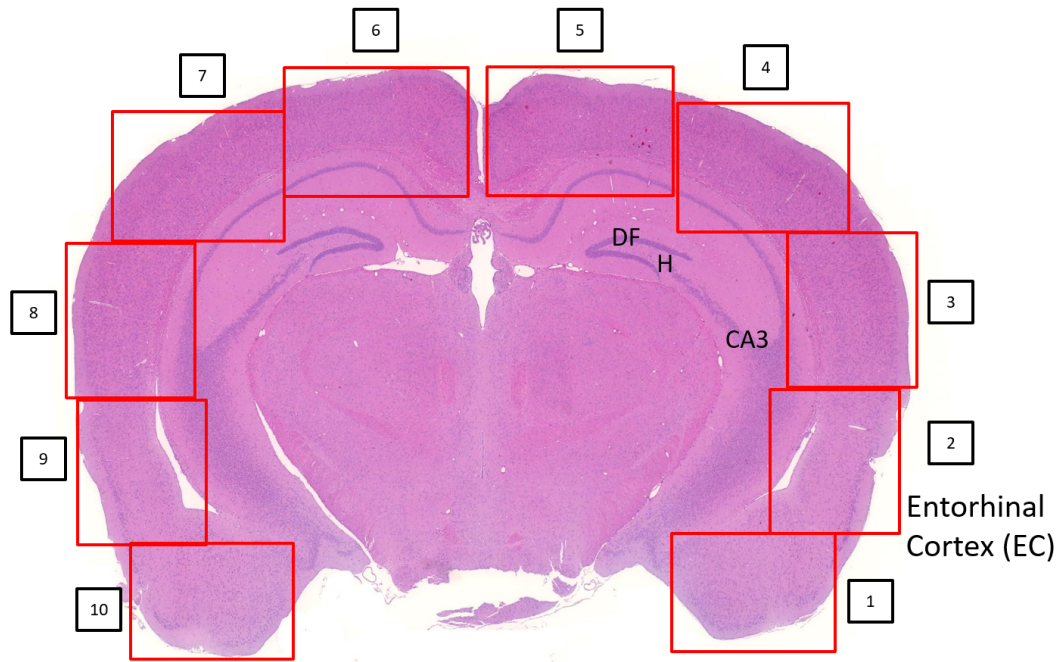

**S1 Fig. The representative view of mouse cortex for neural cell counting.**

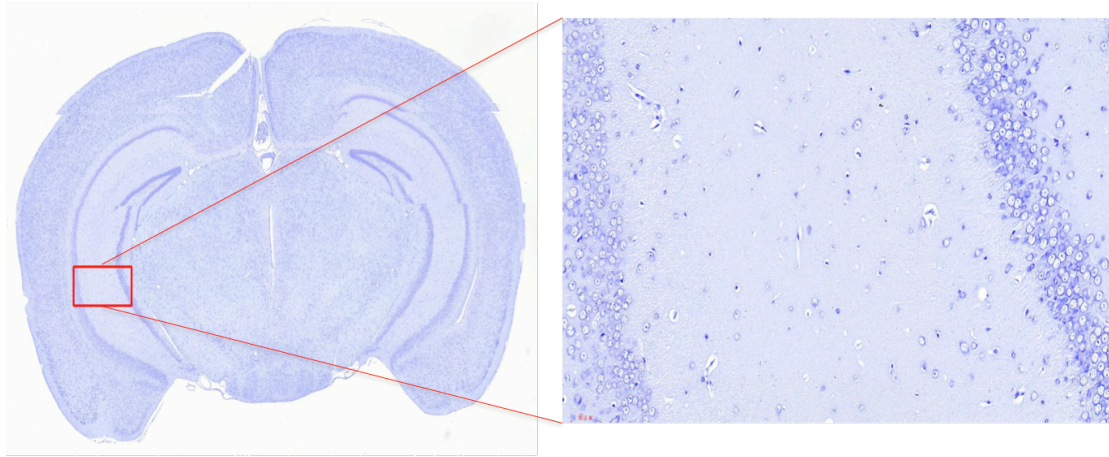

**S2 Fig. The representative view of mouse hippocampus for neural cell counting.**

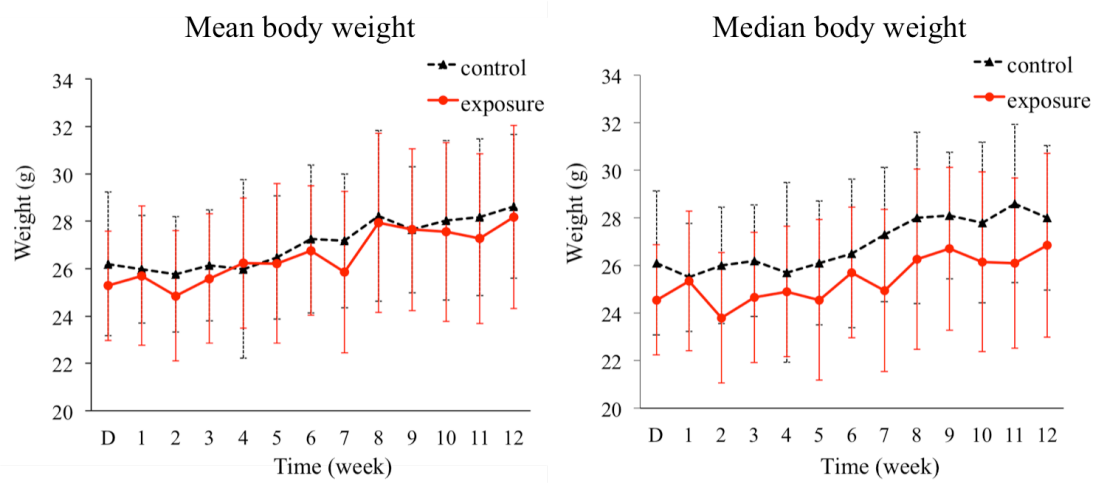

**S3 Fig. The boy weight of AD mice around three-month exposure period.**

## Acquisition phase

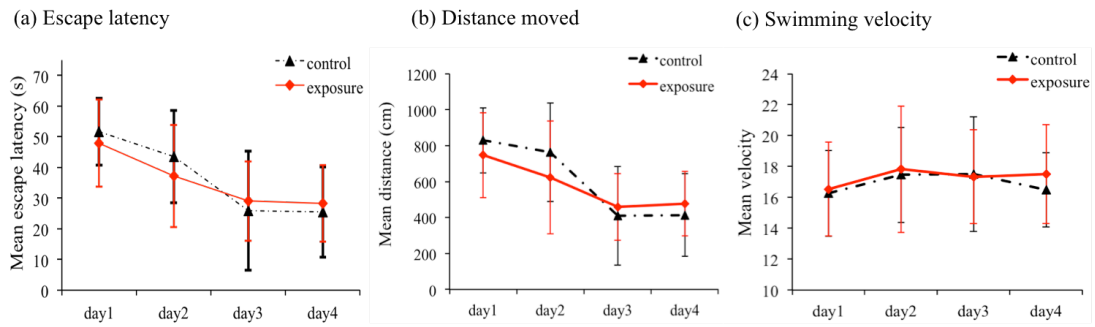

## Probe trial

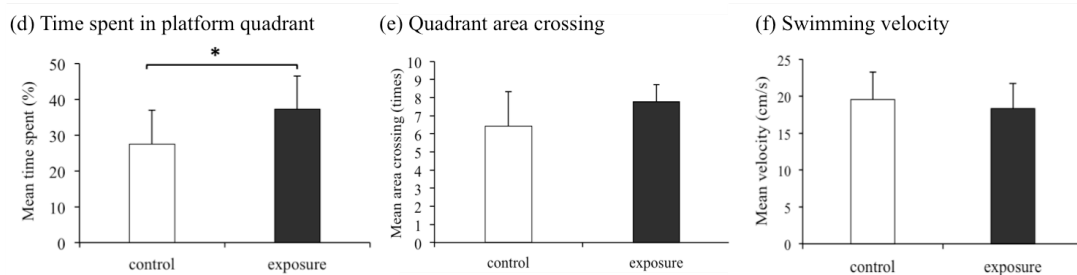

**S4 Fig. The behavior performance of Morris Water Maze test after exposure.** The average escape latency (a), distance moved (b), and swimming velocity (c) for the acquisition phase (the first 4 days) as well as the average time spent in platform quadrant (d), quadrant area crossing (e), and swimming velocity (f) for the probe trial (the 5th day).

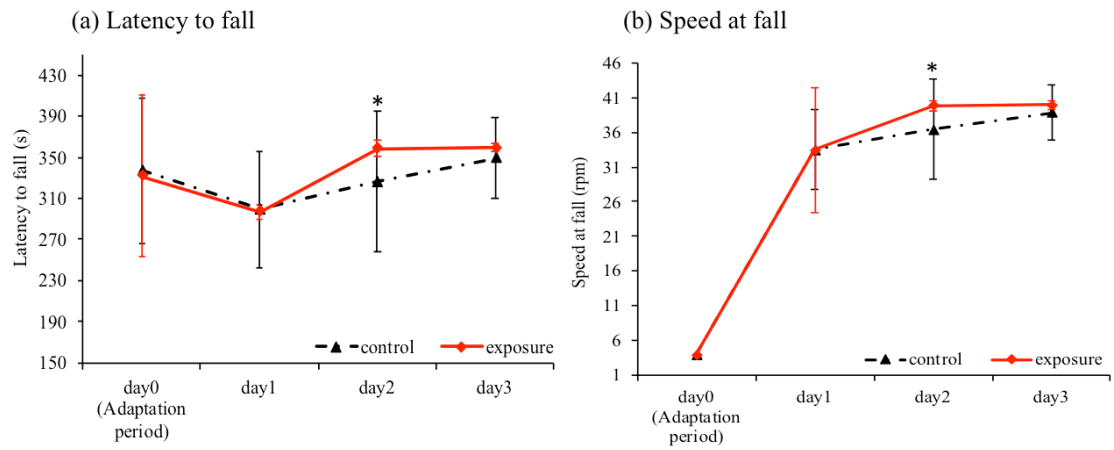

**S5 Fig. The behavior performance of rotarod test after exposure. The average latency to fall (a) and speed at fall (b) around four days.**

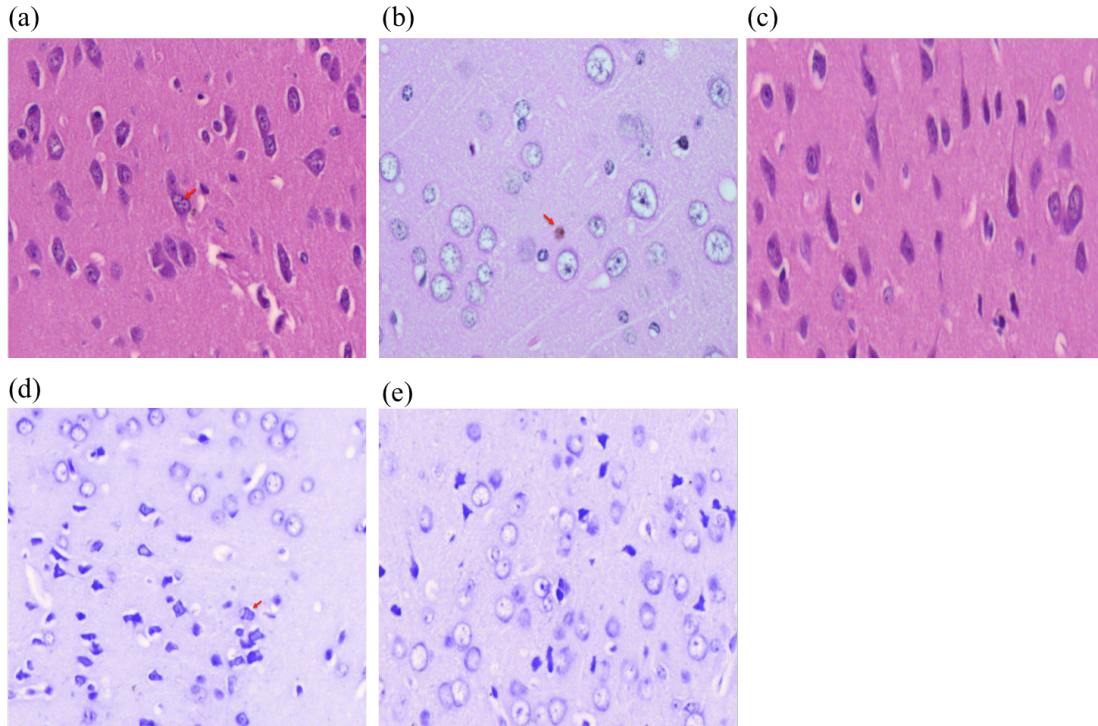

**S6 Fig. The histopathological views of neuronal morphological alterations in the AD mouse brains (400X).** In the representative H&E images, the granulovacuolar degeneration (a) and lipofuscin (b) were found in the PM<sub>2.5</sub> exposure group, but not in the control group (c). The results from nissl staining also showed the granulovacuolar degeneration in the certain PM<sub>2.5</sub>-exposed mouse brain (d), but not in the control mouse brain (e).

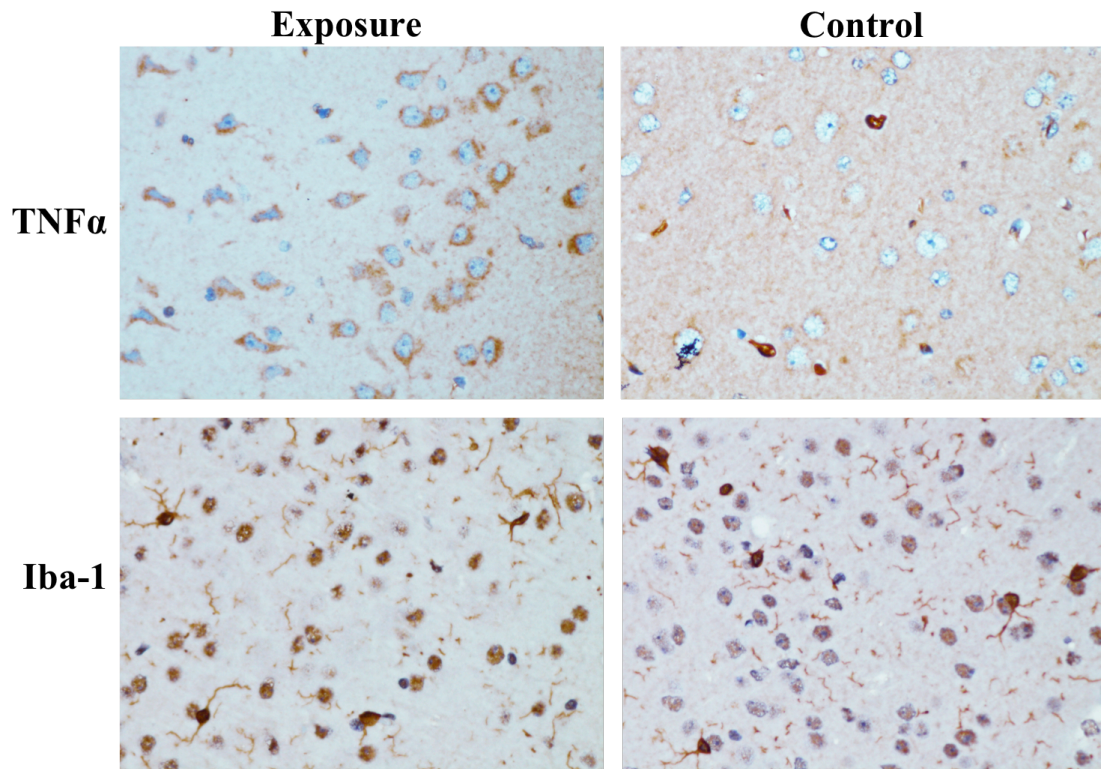

**S7 Fig. The histopathological views of IHC staining (400X) of TNF $\alpha$  and Iba-1 in the cortex of AD mice in the PM<sub>2.5</sub> exposure or control group.**



**S1 Table. The total metal ion composition of the PM<sub>2.5</sub> around exposure period.**

|    | Mean (ng/m <sup>3</sup> ) | Median (ng/m <sup>3</sup> ) | SD (ng/m <sup>3</sup> ) | Min (ng/m <sup>3</sup> ) | Max (ng/m <sup>3</sup> ) |
|----|---------------------------|-----------------------------|-------------------------|--------------------------|--------------------------|
| Al | 66.4                      | 72.6                        | 27.4                    | 28.7                     | 110.7                    |
| Fe | 94.5                      | 91.3                        | 30.3                    | 64.5                     | 152.5                    |
| Na | 165.8                     | 168.5                       | 32.6                    | 119.4                    | 229.6                    |
| Mg | 38.9                      | 37.7                        | 12.2                    | 22.8                     | 59.6                     |
| K  | 159.5                     | 154.8                       | 101.9                   | 53.2                     | 368.3                    |
| Ca | 282.9                     | 254.0                       | 101.8                   | 170.9                    | 511.4                    |
| Sr | 1.3                       | 0.8                         | 2.2                     | 0.4                      | 6.9                      |
| Ba | 3.0                       | 2.1                         | 4.4                     | 1.0                      | 14.5                     |
| Ti | 5.8                       | 5.8                         | 2.0                     | 4.0                      | 10.4                     |
| Mn | 8.6                       | 8.3                         | 2.9                     | 4.6                      | 13.2                     |
| Co | 0.1                       | 0.1                         | 0.0                     | 0.1                      | 0.1                      |
| Ni | 4.0                       | 3.6                         | 1.7                     | 2.4                      | 7.3                      |
| Cu | 5.7                       | 4.3                         | 2.9                     | 4.2                      | 12.6                     |
| Zn | 20.2                      | 18.0                        | 5.9                     | 13.3                     | 31.7                     |
| Mo | 0.5                       | 0.4                         | 0.2                     | 0.3                      | 1.0                      |
| Cd | 0.2                       | 0.2                         | 0.1                     | 0.1                      | 0.5                      |
| Sn | 2.1                       | 2.0                         | 0.9                     | 1.0                      | 3.4                      |
| Sb | 0.9                       | 0.7                         | 0.5                     | 0.4                      | 2.2                      |
| Tl | 0.1                       | 0.0                         | 0.0                     | 0.0                      | 0.1                      |
| Pb | 10.2                      | 7.1                         | 5.7                     | 3.6                      | 21.3                     |
| V  | 5.9                       | 5.7                         | 1.7                     | 3.6                      | 8.7                      |
| Cr | 3.0                       | 2.7                         | 1.2                     | 2.2                      | 5.8                      |
| As | 0.9                       | 0.8                         | 0.3                     | 0.4                      | 1.5                      |

**S2 Table. The water-soluble metal ion composition of the PM<sub>2.5</sub> around exposure period.**

|    | Mean (ng/m <sup>3</sup> ) | Median (ng/m <sup>3</sup> ) | SD (ng/m <sup>3</sup> ) | Min (ng/m <sup>3</sup> ) | Max (ng/m <sup>3</sup> ) |
|----|---------------------------|-----------------------------|-------------------------|--------------------------|--------------------------|
| Al | 10.5                      | 10.5                        | 7.0                     | 4.1                      | 25.3                     |
| Fe | 17.3                      | 20.0                        | 8.3                     | 6.8                      | 27.7                     |
| Na | 107.8                     | 116.0                       | 15.6                    | 77.8                     | 130.8                    |
| Mg | 16.5                      | 16.6                        | 7.0                     | 9.4                      | 33.7                     |
| K  | 124.3                     | 138.8                       | 72.5                    | 45.7                     | 278.9                    |
| Ca | 31.3                      | 23.1                        | 19.3                    | 17.7                     | 74.3                     |
| Sr | 0.9                       | 0.4                         | 2.1                     | 0.2                      | 6.4                      |
| Ba | 2.3                       | 1.2                         | 3.9                     | 0.8                      | 12.5                     |
| Ti | 0.5                       | 0.4                         | 0.2                     | 0.3                      | 0.8                      |
| Mn | 4.6                       | 4.8                         | 1.9                     | 2.3                      | 7.6                      |
| Co | 0.0                       | 0.0                         | 0.0                     | 0.0                      | 0.0                      |
| Ni | 1.2                       | 1.2                         | 0.4                     | 0.7                      | 2.0                      |
| Cu | 3.1                       | 2.6                         | 2.3                     | 1.5                      | 8.6                      |
| Zn | 23.7                      | 22.9                        | 7.1                     | 15.4                     | 37.5                     |
| Mo | 0.2                       | 0.2                         | 0.1                     | 0.1                      | 0.4                      |
| Cd | 0.2                       | 0.1                         | 0.1                     | 0.1                      | 0.4                      |
| Sn | 0.3                       | 0.3                         | 0.2                     | 0.1                      | 0.6                      |
| Sb | 0.5                       | 0.4                         | 0.3                     | 0.1                      | 1.0                      |
| Tl | 0.0                       | 0.0                         | 0.0                     | 0.0                      | 0.1                      |
| Pb | 5.7                       | 4.0                         | 3.6                     | 1.5                      | 13.4                     |
| V  | 3.7                       | 3.6                         | 1.3                     | 1.7                      | 5.8                      |
| Cr | 0.4                       | 0.4                         | 0.1                     | 0.2                      | 0.7                      |
| As | 0.7                       | 0.7                         | 0.3                     | 0.3                      | 1.1                      |
