# Supplementary material for: Three month inhalation exposure to low-level PM2.5 induced brain toxicity in an Alzheimer’s disease mouse model
Source: PubMed Central journal article supplement (PMC8389369; doi:10.1371/journal.pone.0254587), 2021-08-26
Supplement: pone.0254587.s002.pdf [file pone.0254587.s002.pdf]

# ECL images in the **Olfactory bulb**

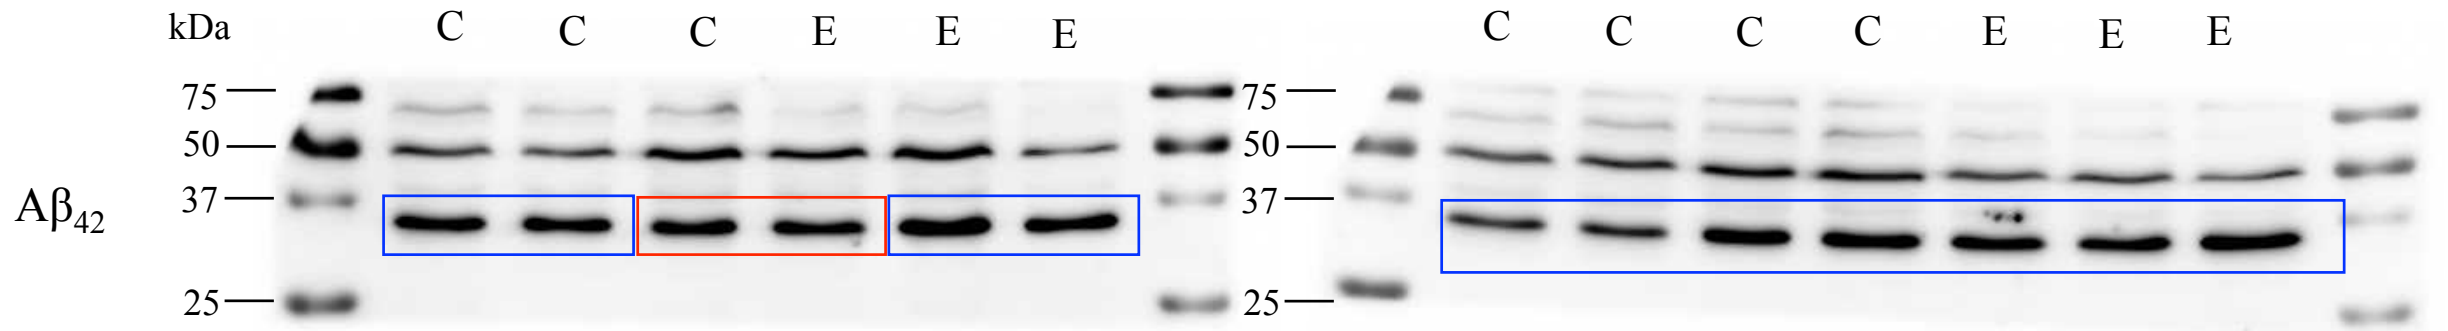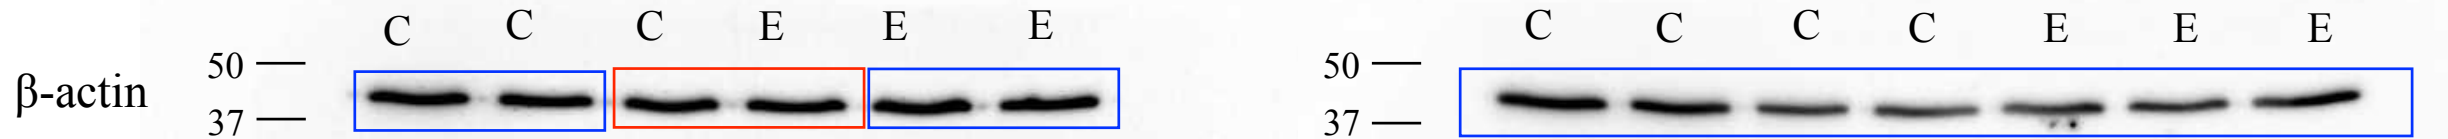

Loading order →

C: control; E: exposure

The **selected area** were used in the statistics and **shown** in the manuscript as the representative images

The **selected area** were used in the statistics, but the images were **not shown** in the manuscript

# ECL images in the Hippocampus

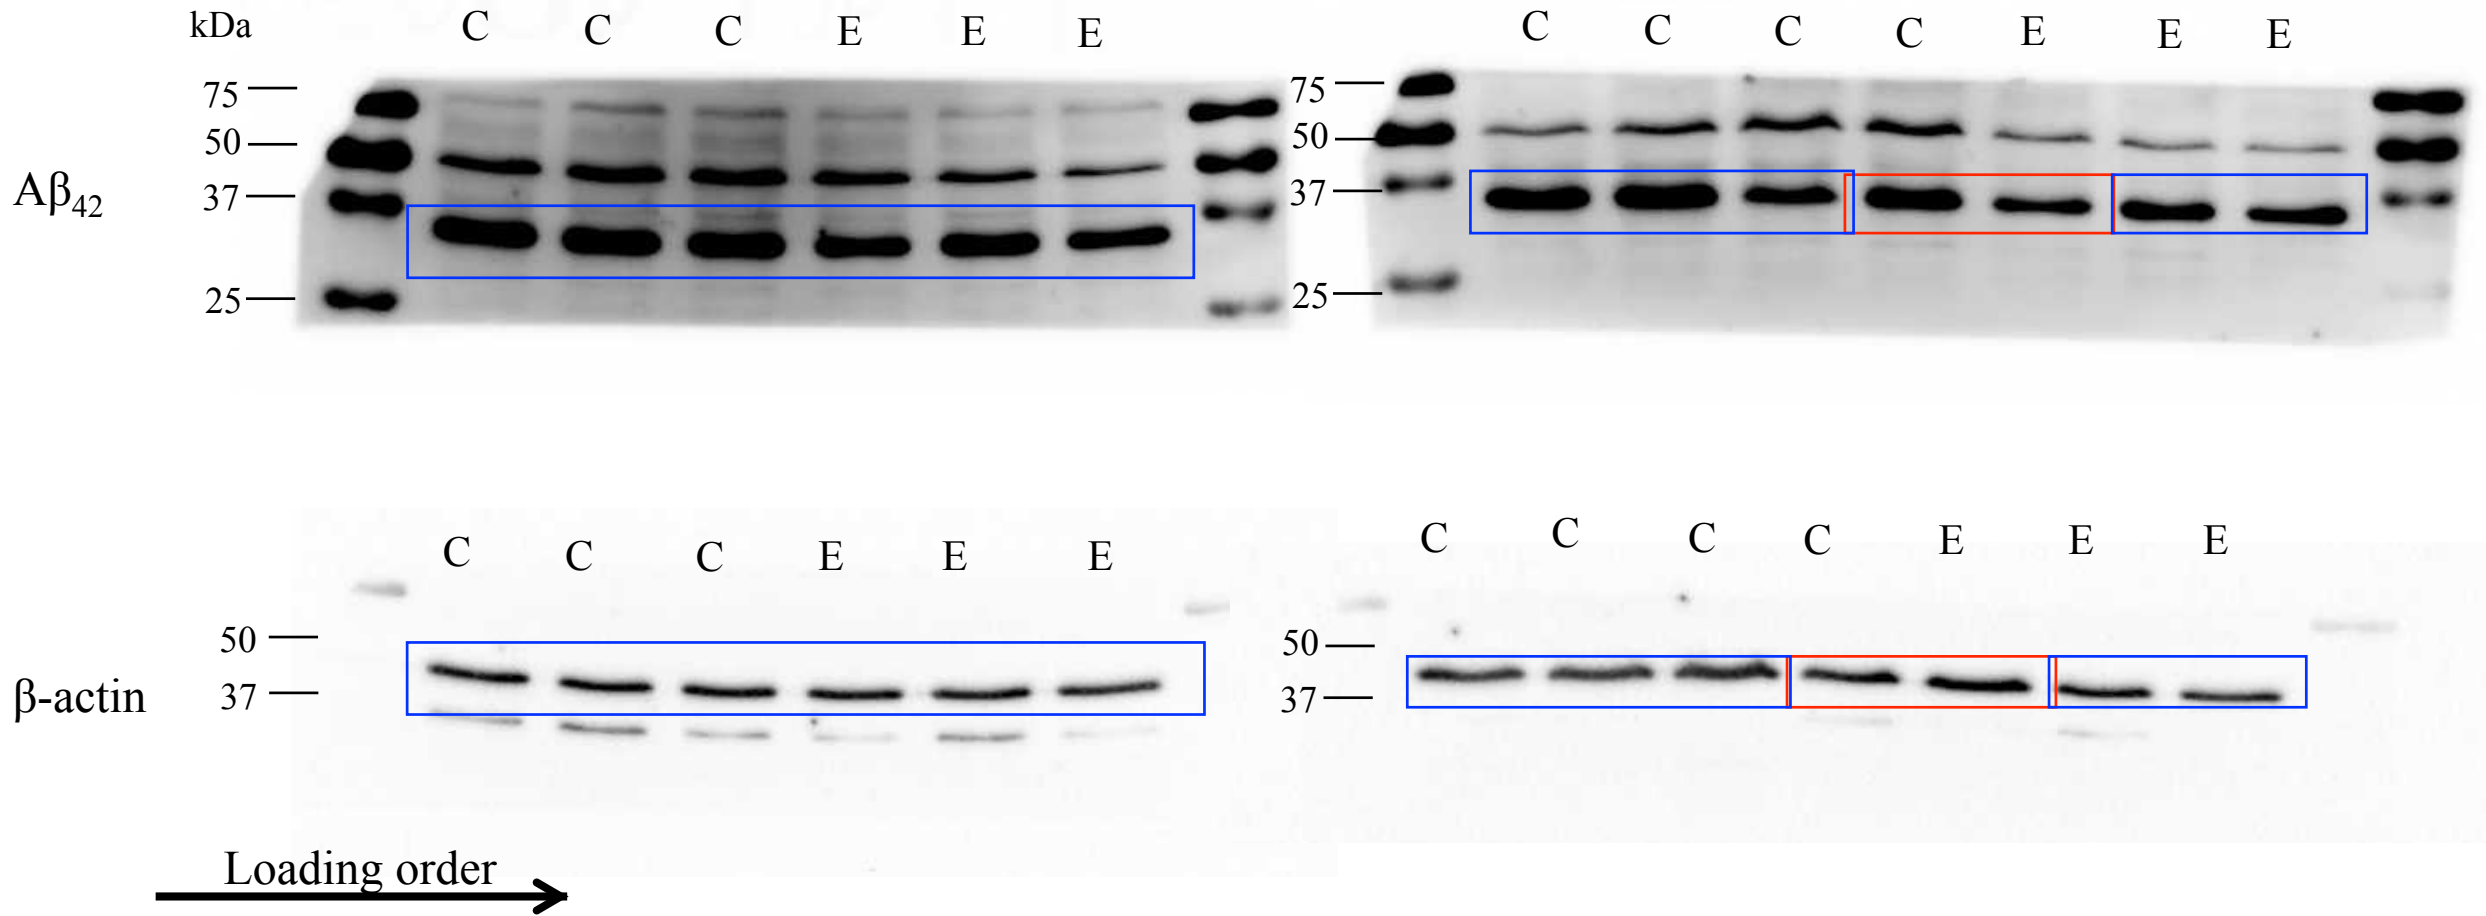

C: control; E: exposure

The **selected area** were used in the statistics and **shown** in the manuscript as the representative images

The **selected area** were used in the statistics, but the images were **not shown** in the manuscript

# ECL images in the Cerebral cortex

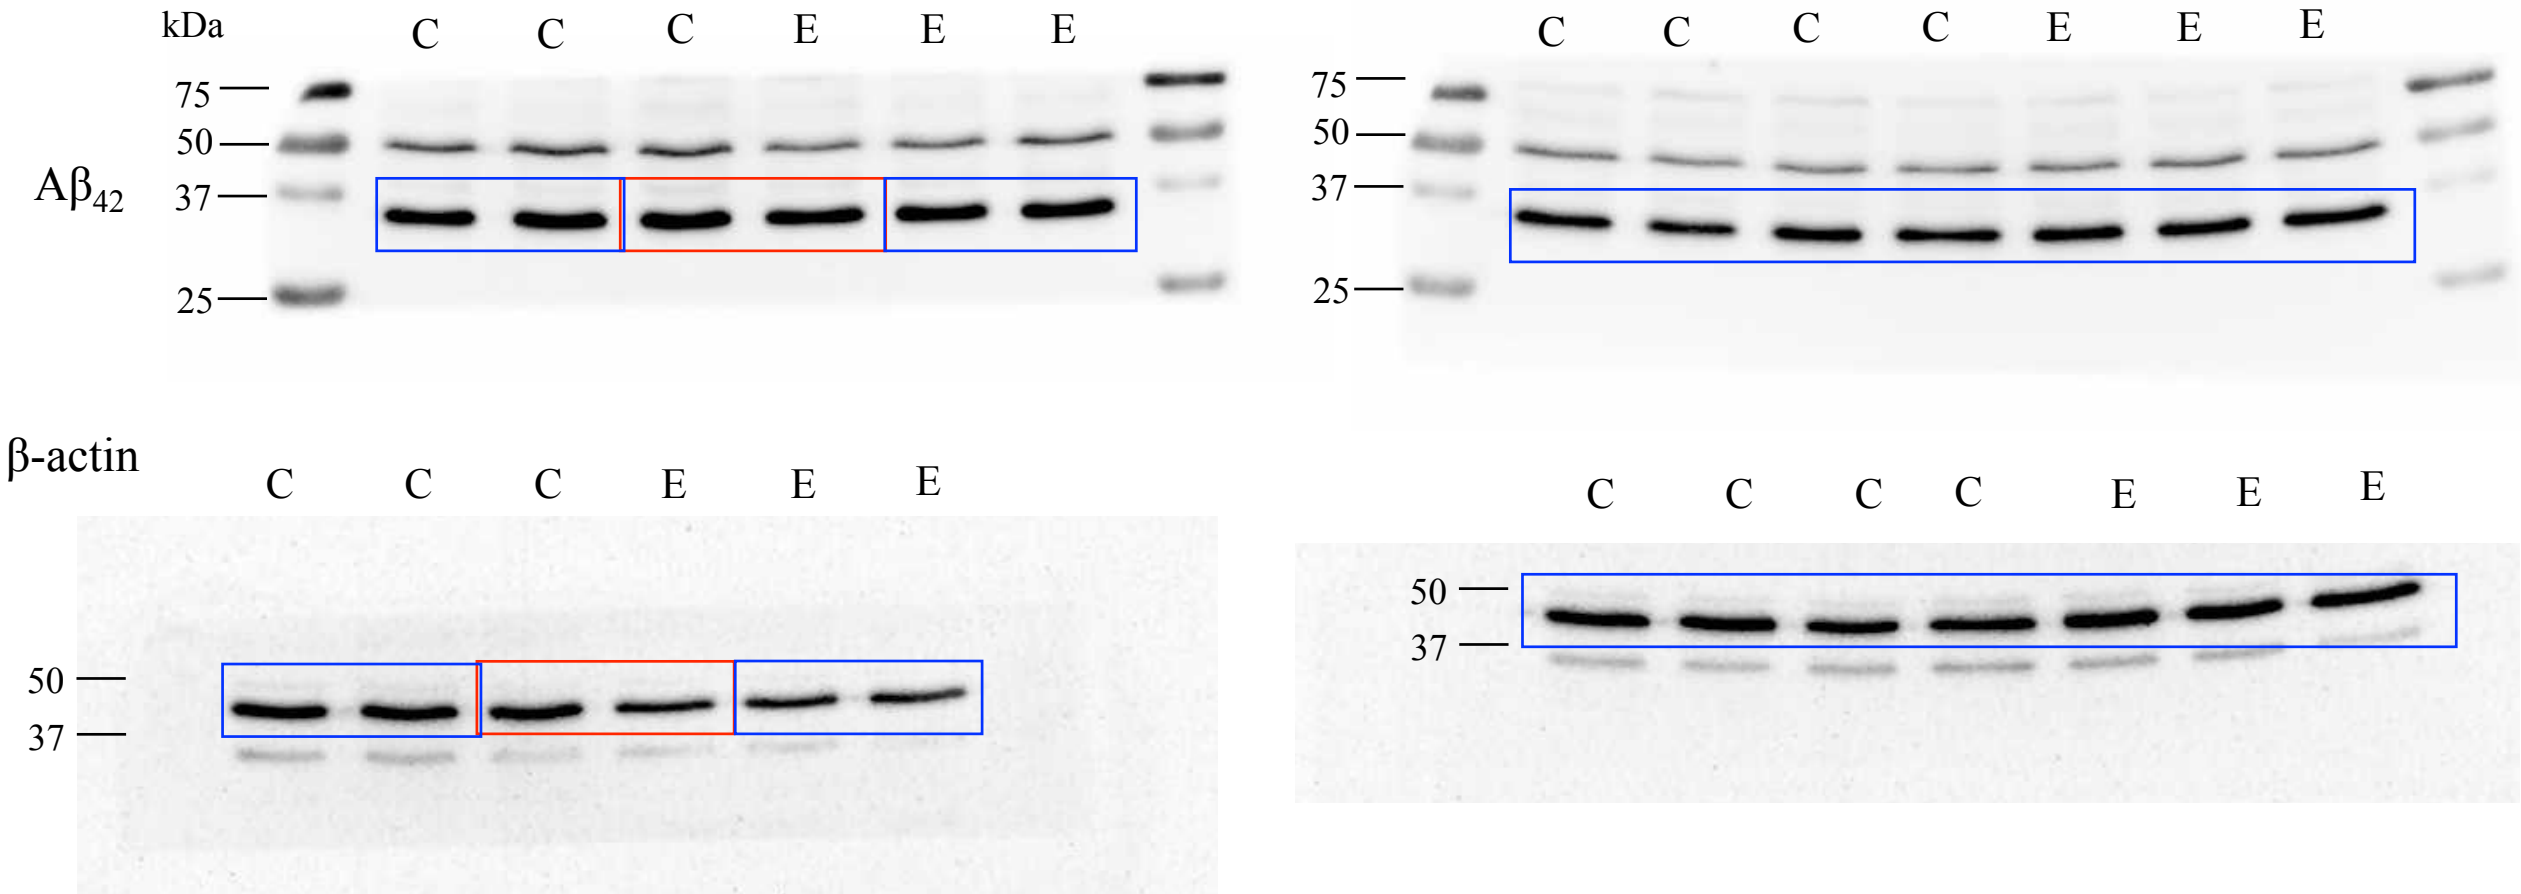

Loading order →

C: control; E: exposure

The **selected area** were used in the statistics and **shown** in the manuscript as the representative images

The **selected area** were used in the statistics, but the images were **not shown** in the manuscript

# ECL images in the Cerebellum

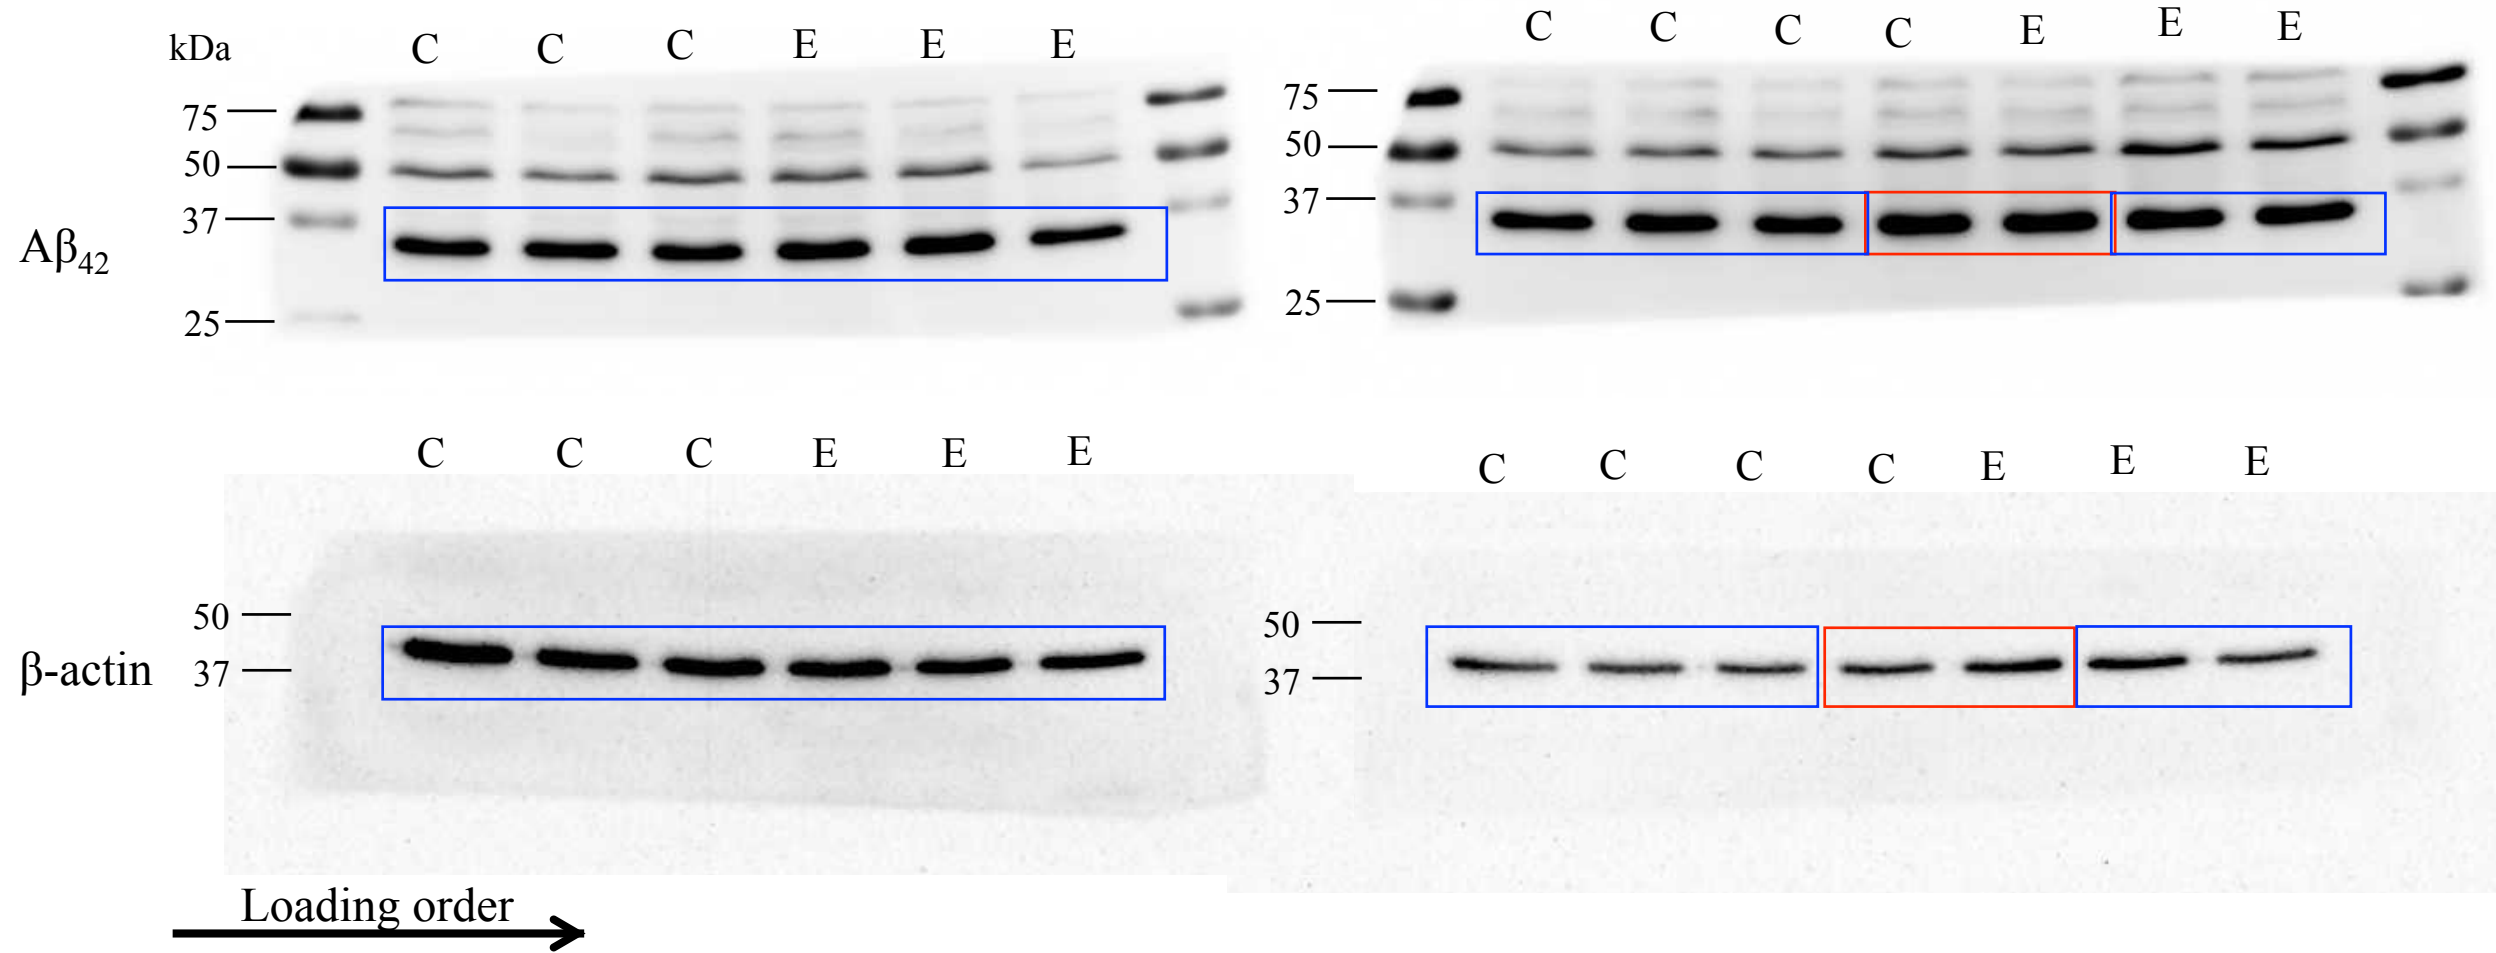

C: control; E: exposure

The **selected area** were used in the statistics and **shown** in the manuscript as the representative images

The **selected area** were used in the statistics, but the images were **not shown** in the manuscript

# ECL images in the **Olfactory bulb**

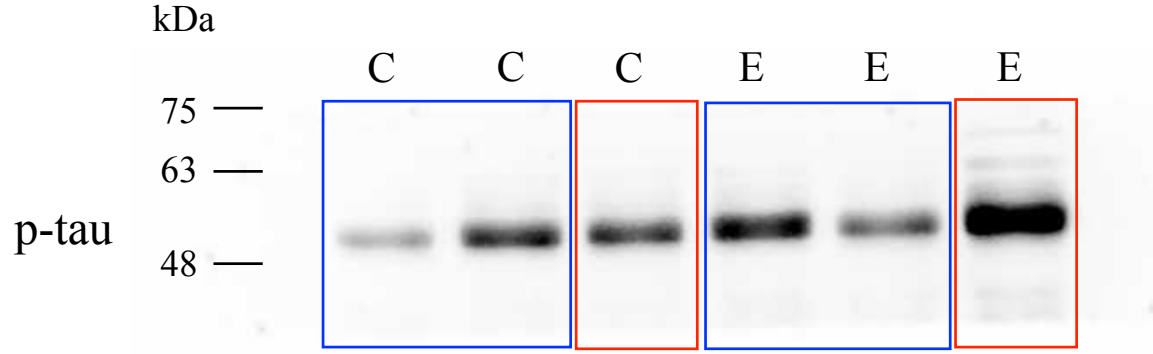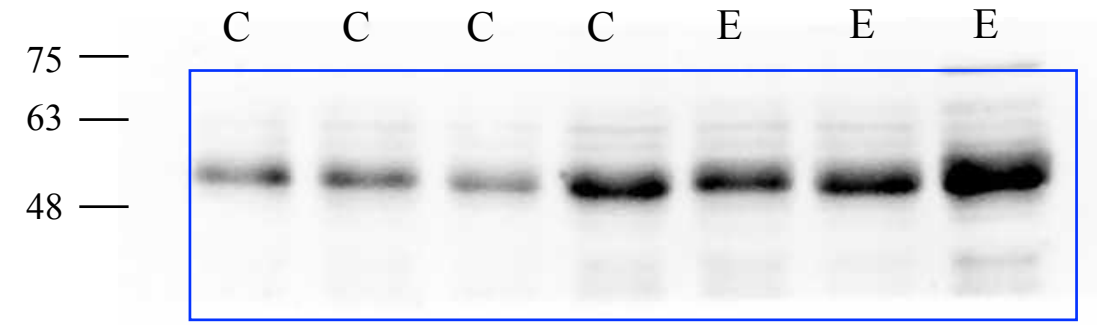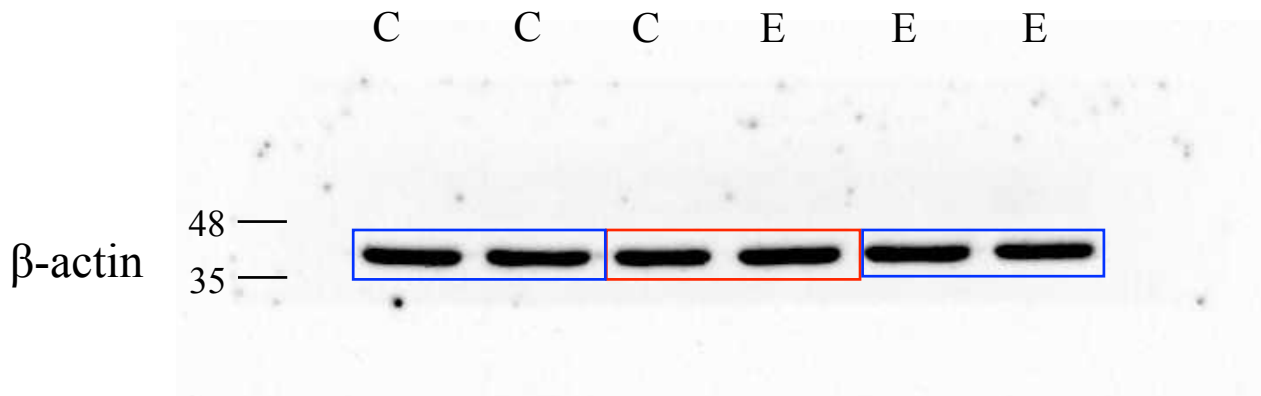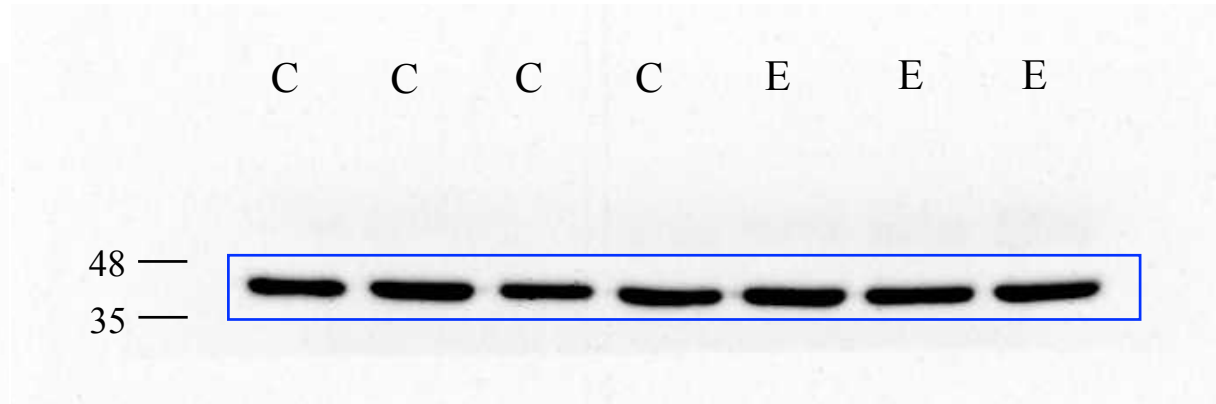

Loading order →

C: control; E: exposure

The **selected area** were used in the statistics and **shown** in the manuscript as the representative images

The **selected area** were used in the statistics, but the images were **not shown** in the manuscript

## ECL images in the Hippocampus

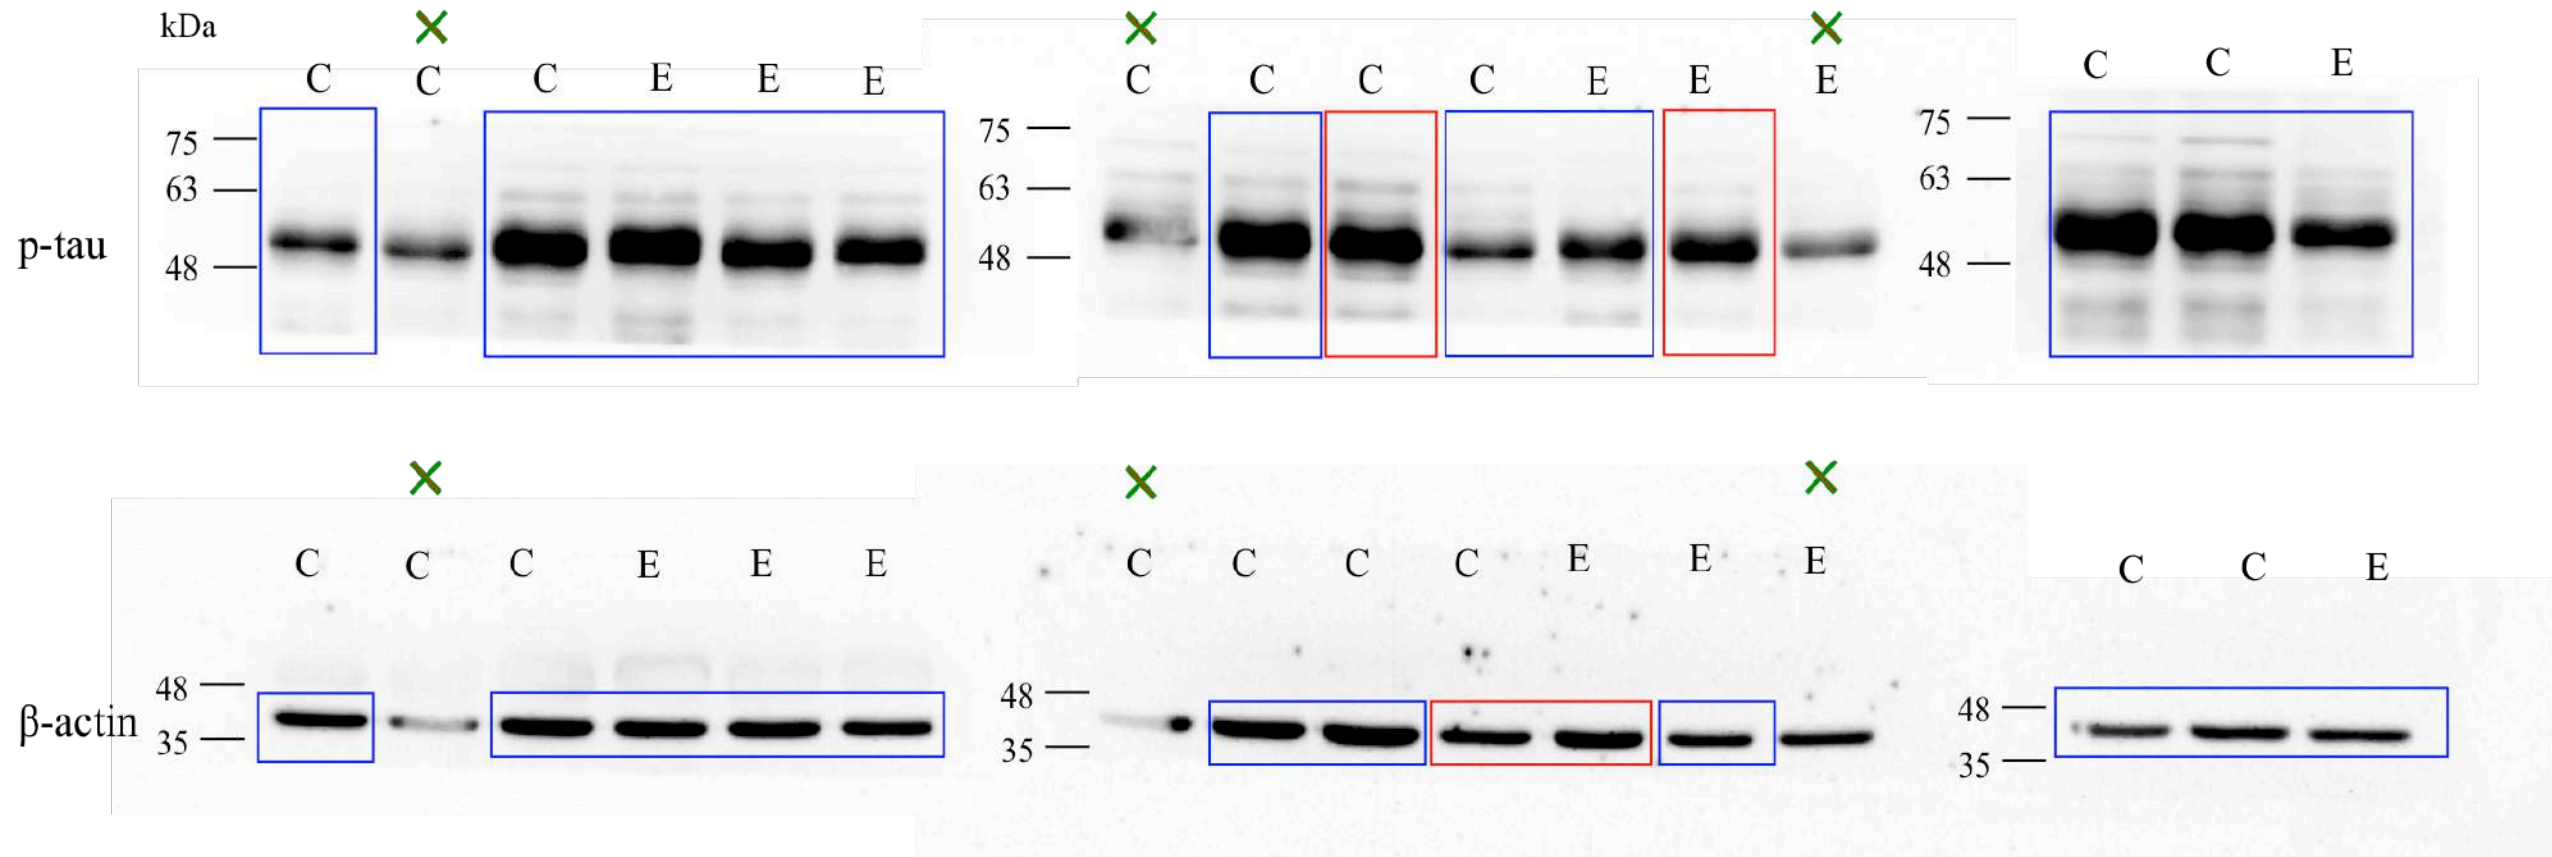

Loading order →

C: control; E: exposure

The **selected area** were used in the statistics and **shown** in the manuscript as the representative images

The **selected area** were used in the statistics, but the images were **not shown** in the manuscript

**X** were **not used** in the statistics and **not shown** in the manuscript

# ECL images in the Cerebral cortex

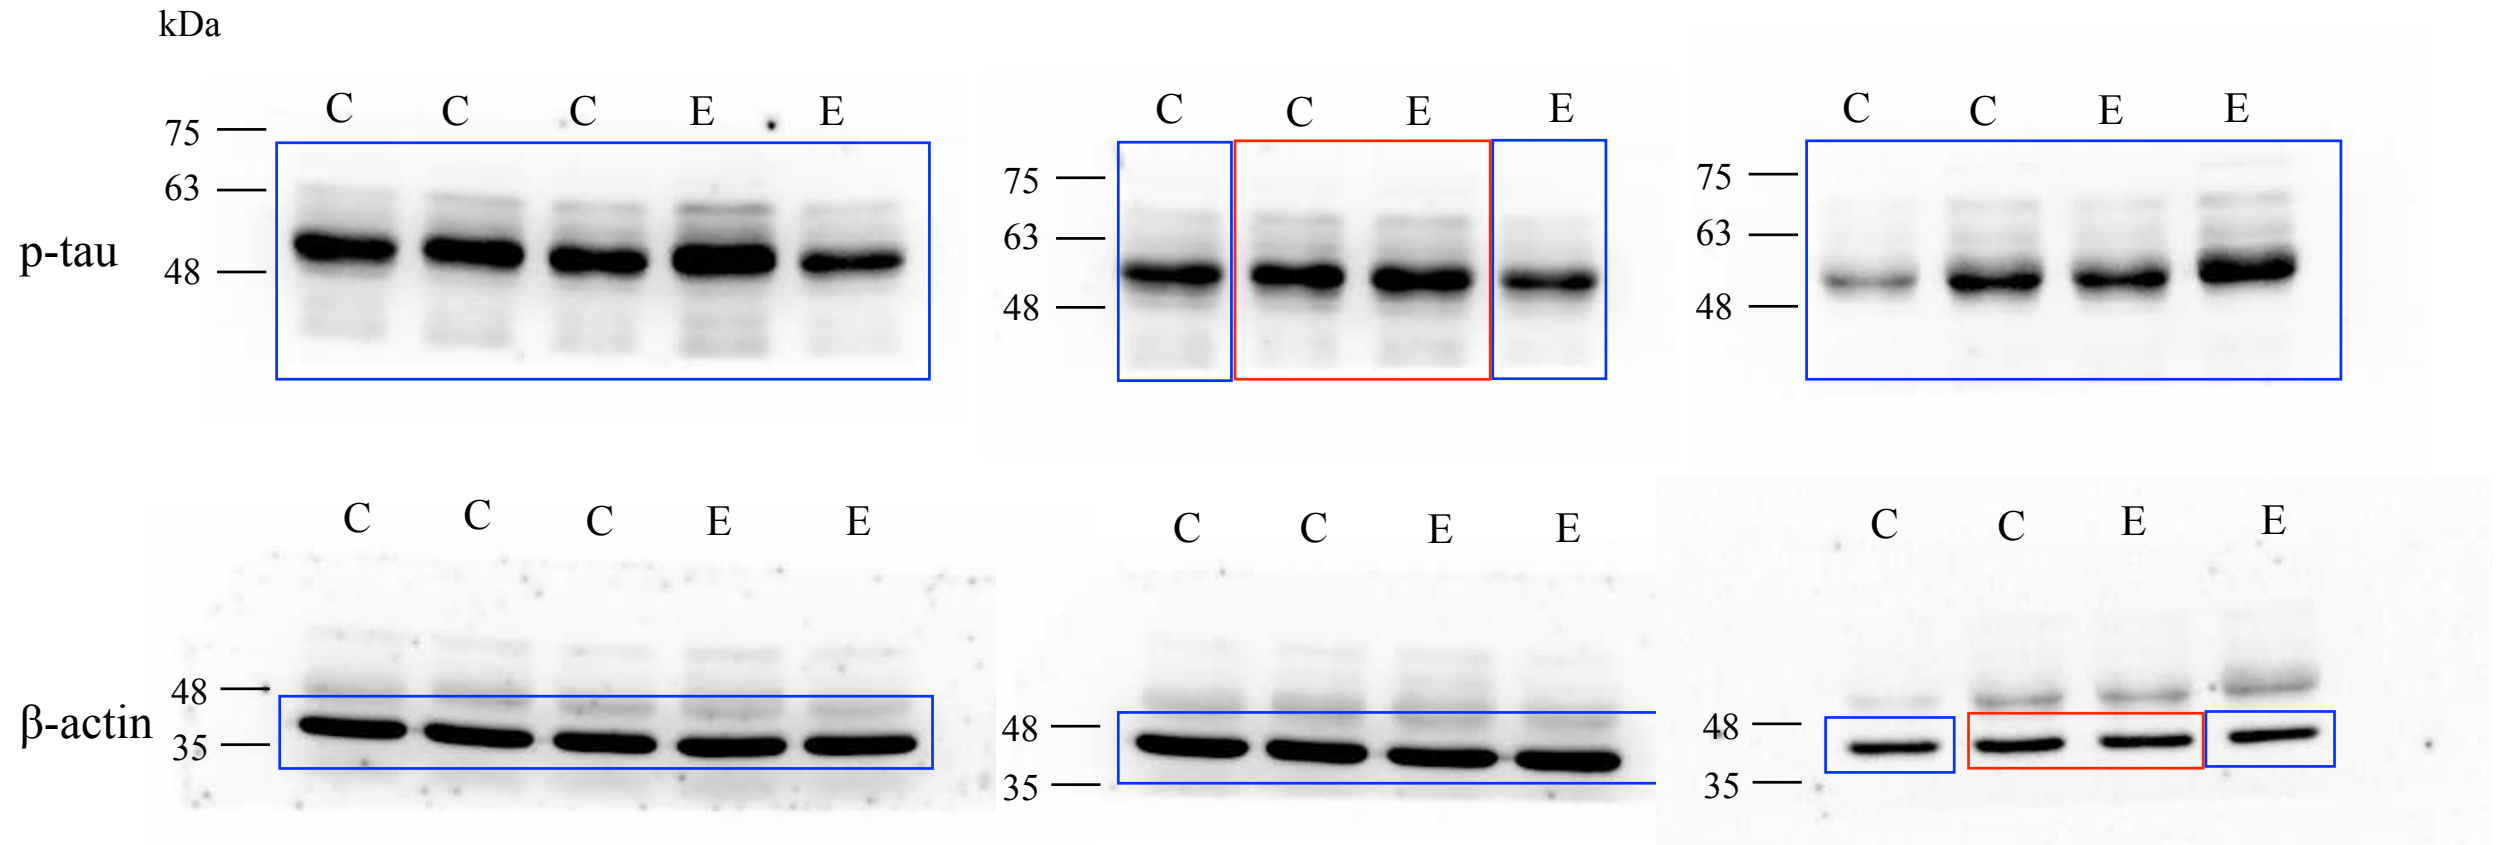

Loading order →

C: control; E: exposure

The **selected area** were used in the statistics and **shown** in the manuscript as the representative images

The **selected area** were used in the statistics, but the images were **not shown** in the manuscript

# ECL images in the Cerebellum

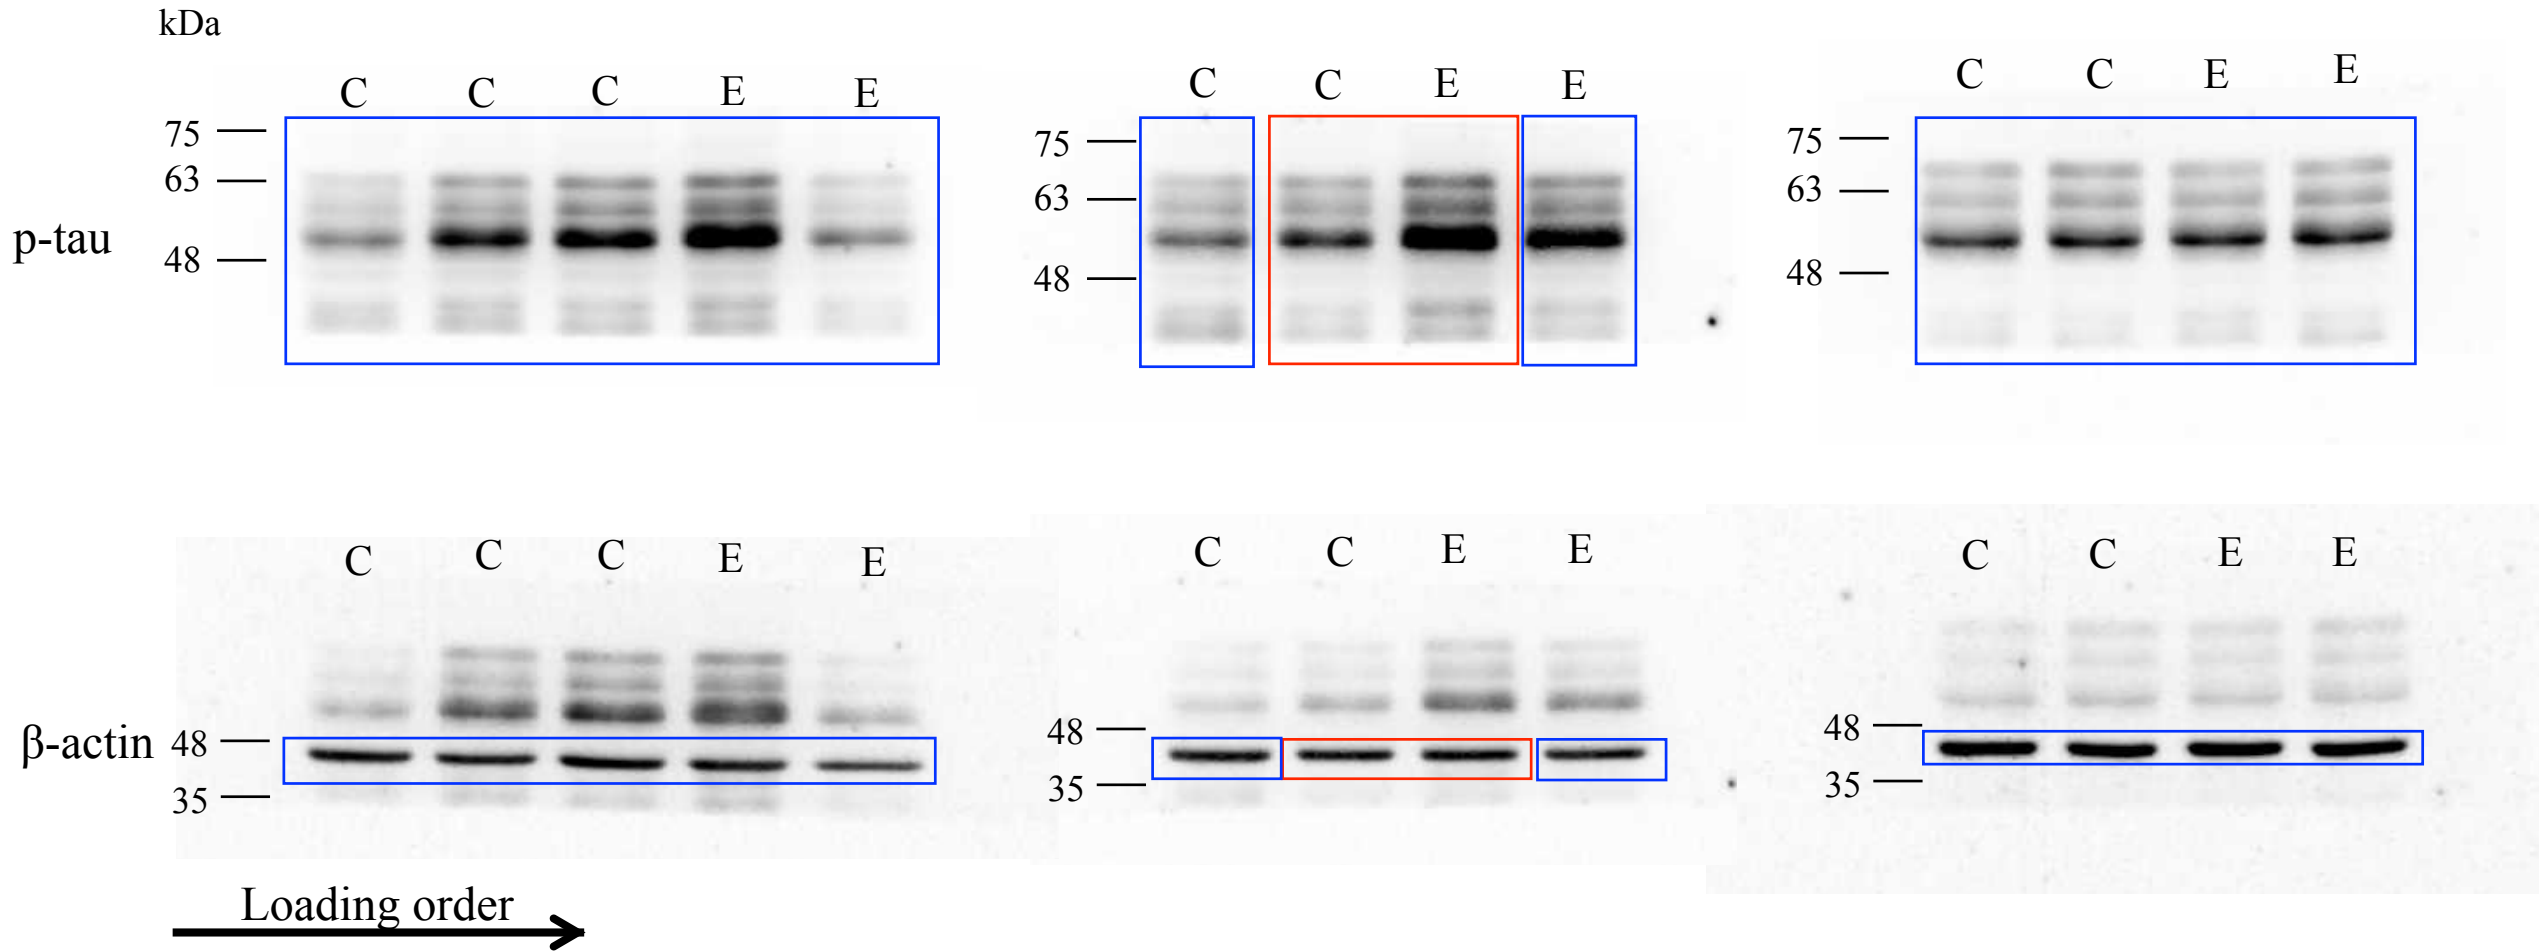

C: control; E: exposure

The **selected area** were used in the statistics and **shown** in the manuscript as the representative images

The **selected area** were used in the statistics, but the images were **not shown** in the manuscript



# ECL images in the **Olfactory bulb**

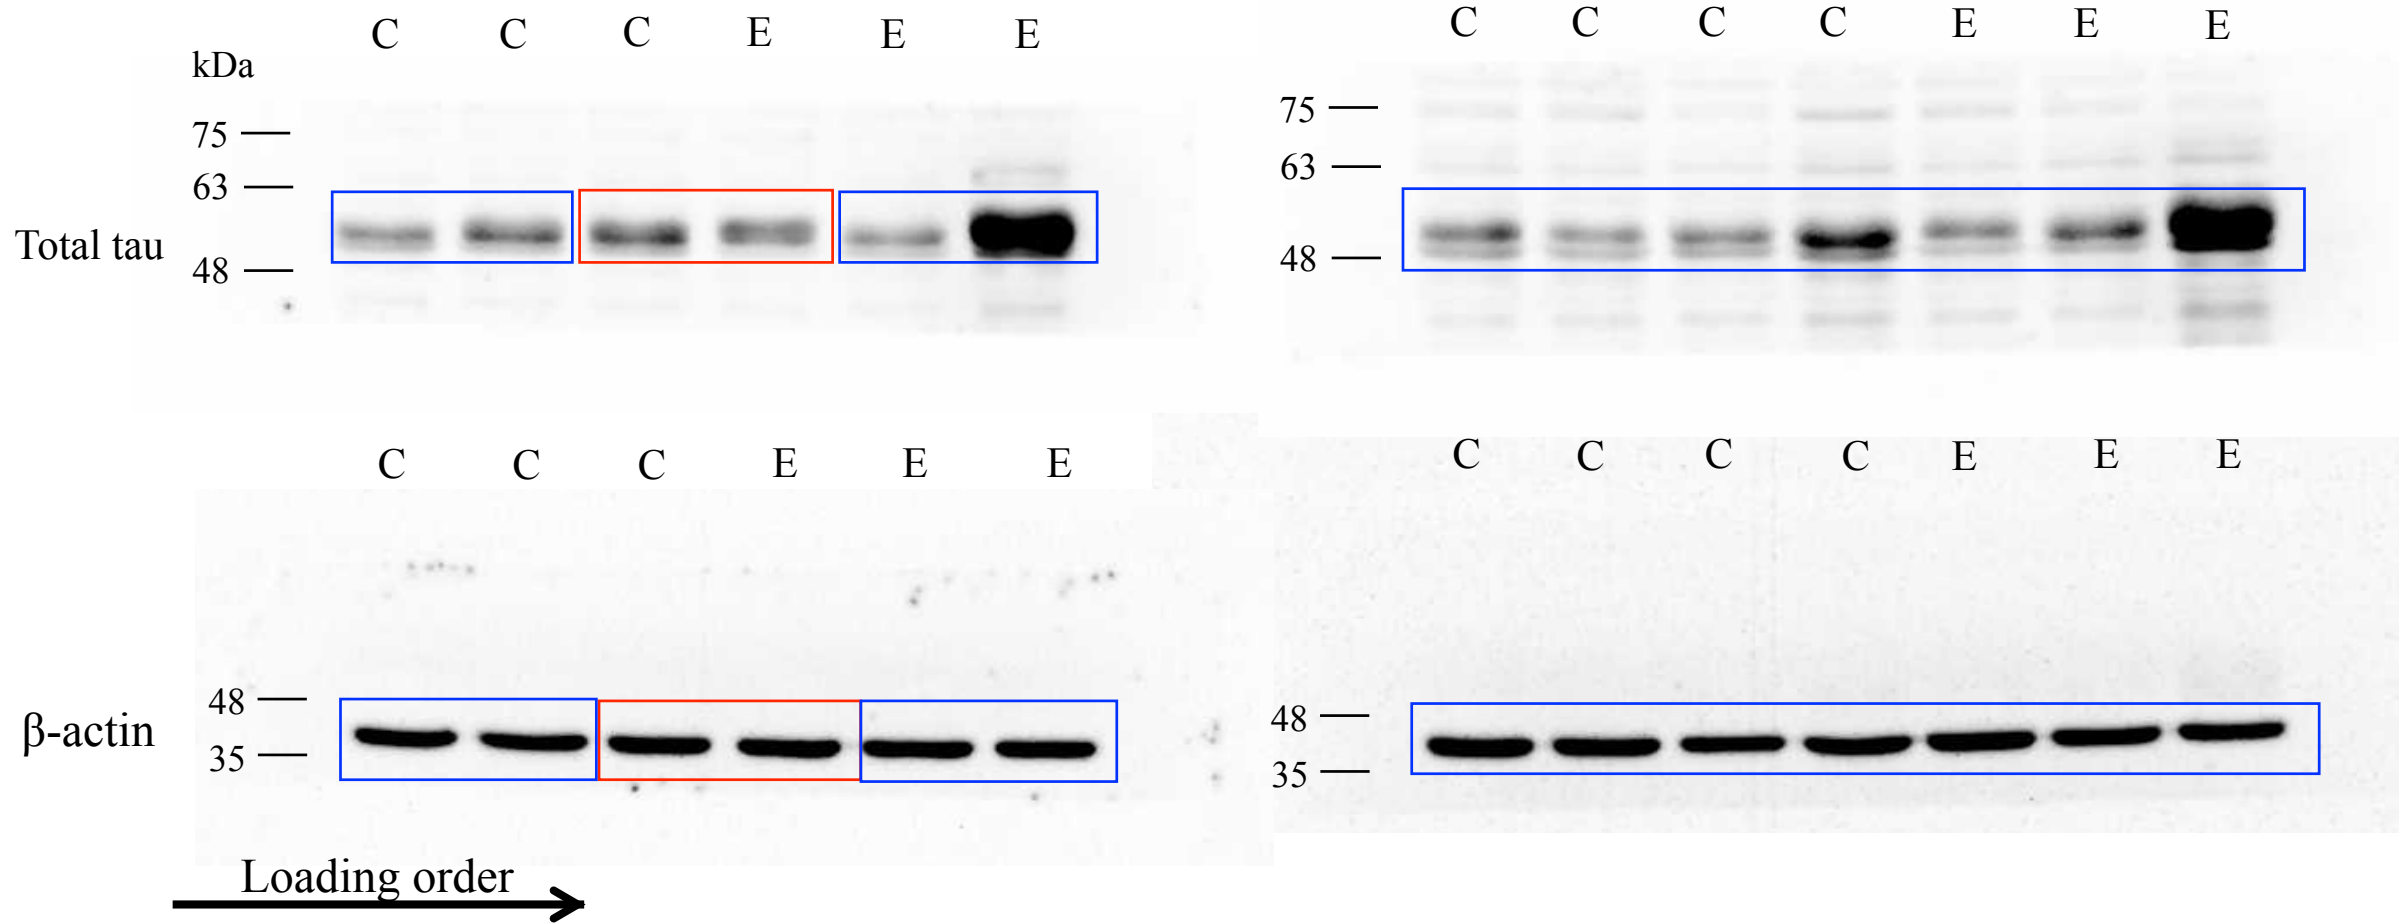

C: control; E: exposure

The **selected area** were used in the statistics and **shown** in the manuscript as the representative images

The **selected area** were used in the statistics, but the images were **not shown** in the manuscript

# ECL images in the **Hippocampus**

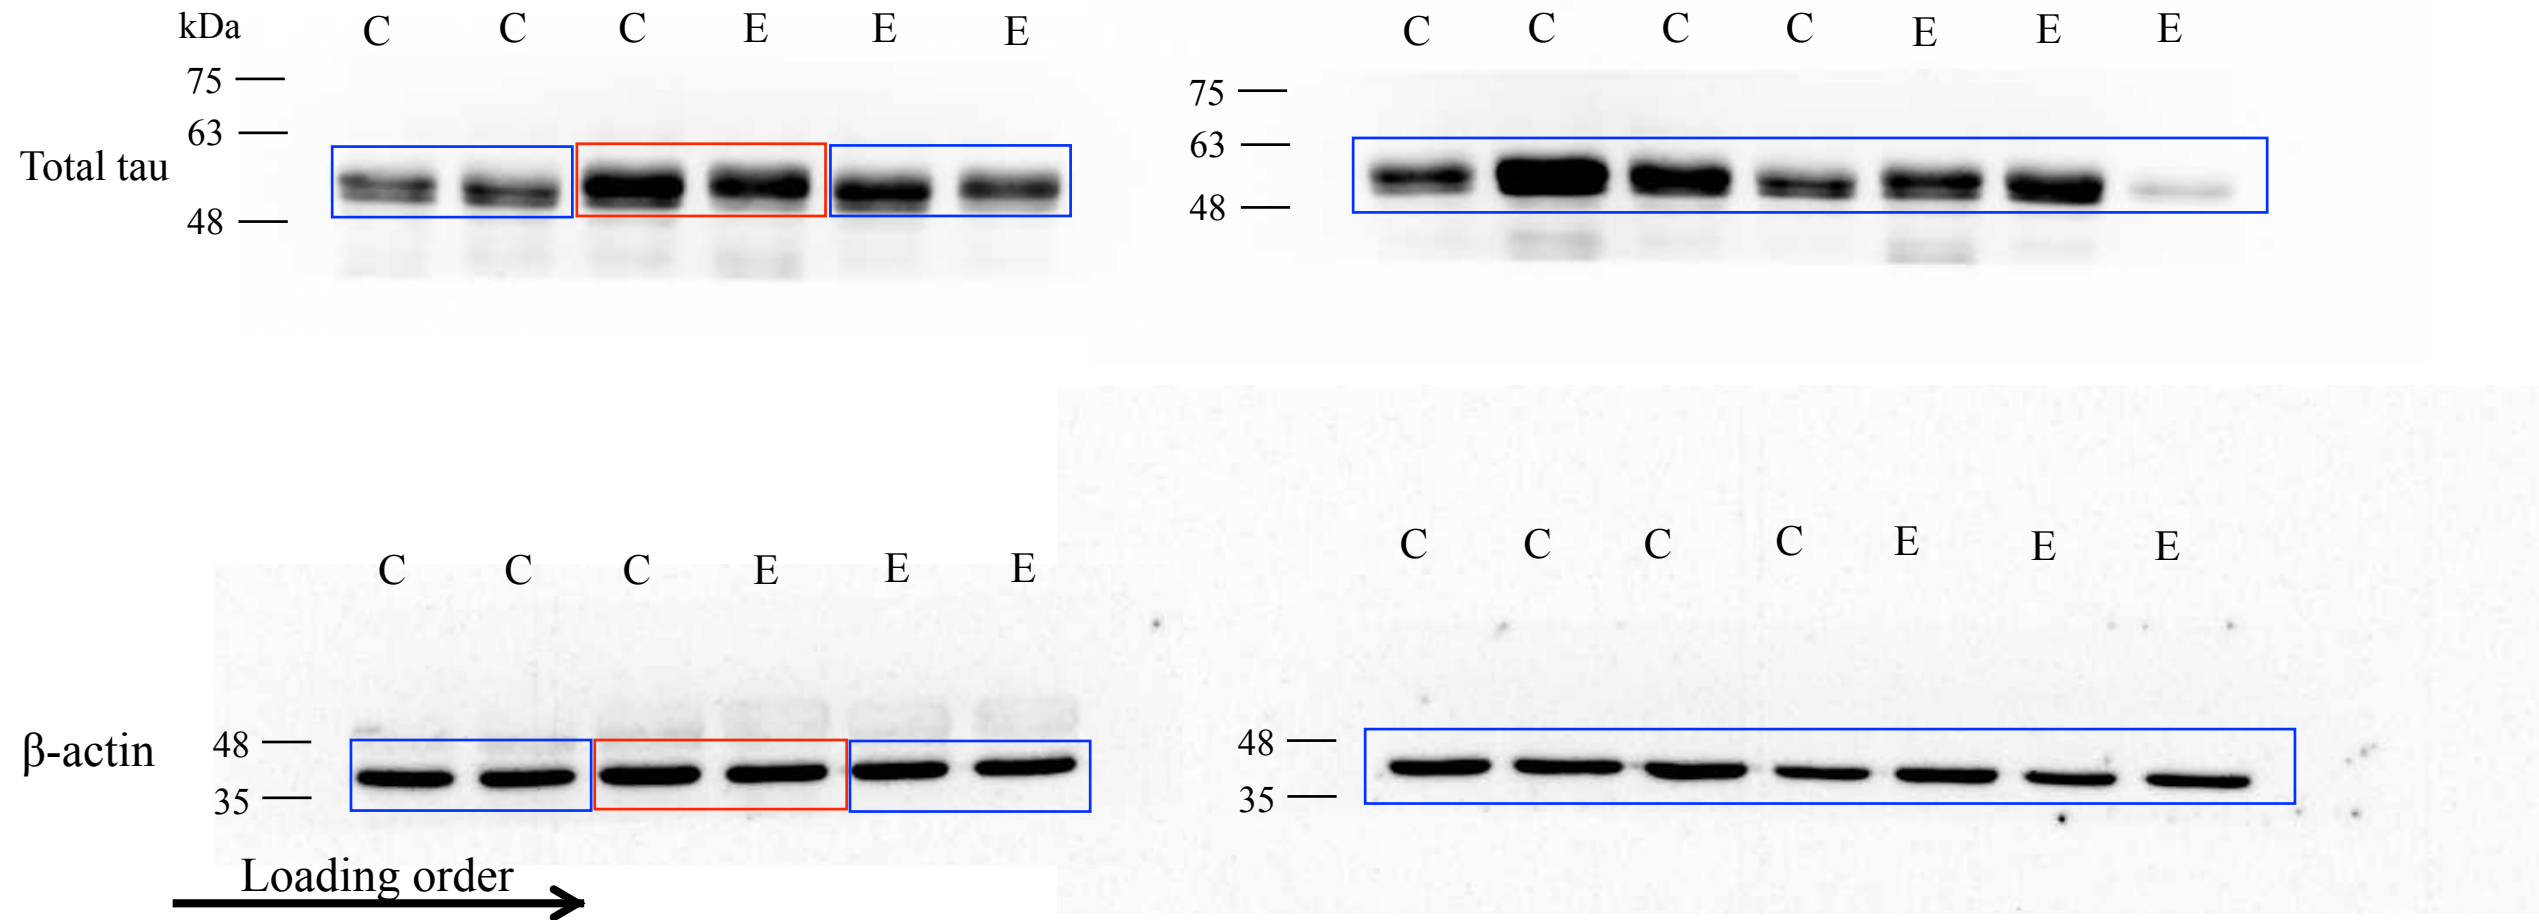

C: control; E: exposure

The **selected area** were used in the statistics and **shown** in the manuscript as the representative images

The **selected area** were used in the statistics, but the images were **not shown** in the manuscript

# ECL images in the Cerebral cortex

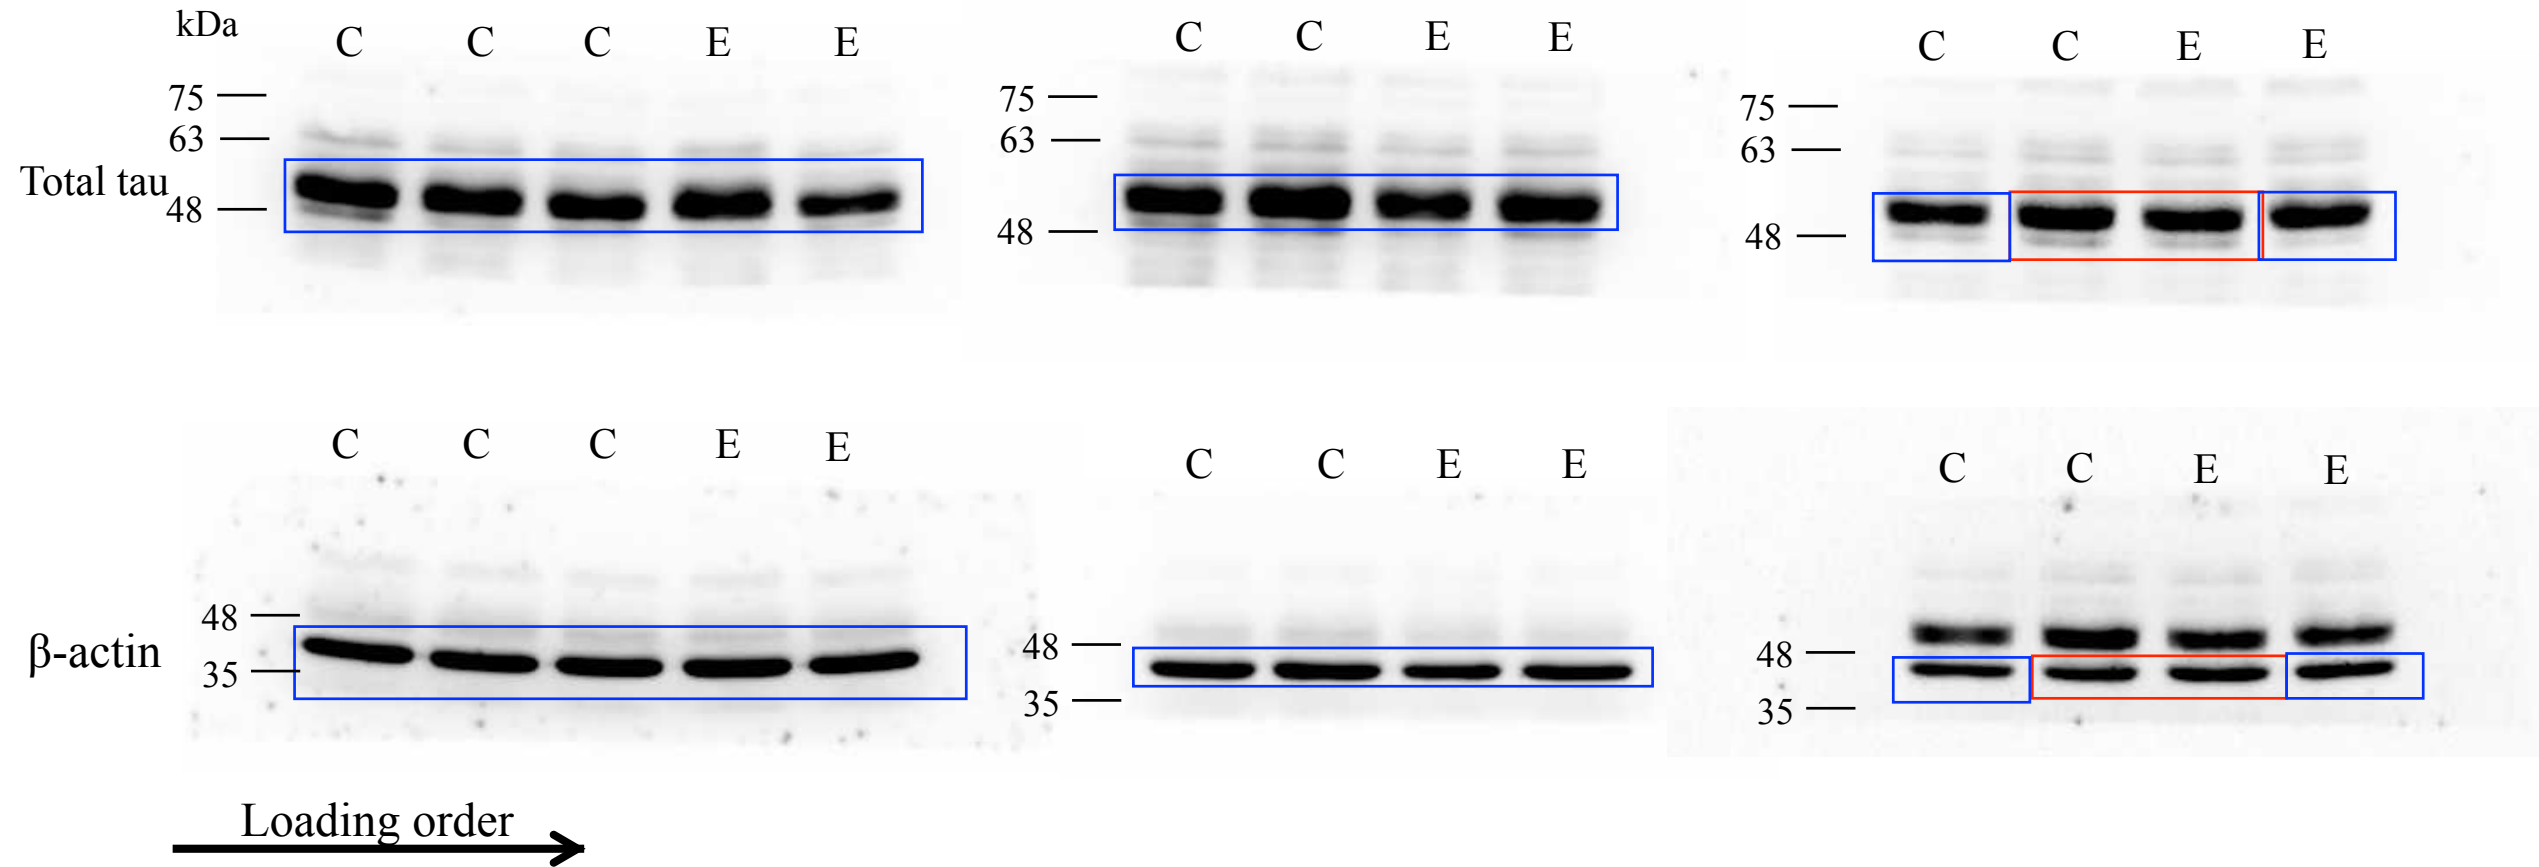

C: control; E: exposure

The **selected area** were used in the statistics and **shown** in the manuscript as the representative images

The **selected area** were used in the statistics, but the images were **not shown** in the manuscript

## ECL images in the Cerebellum

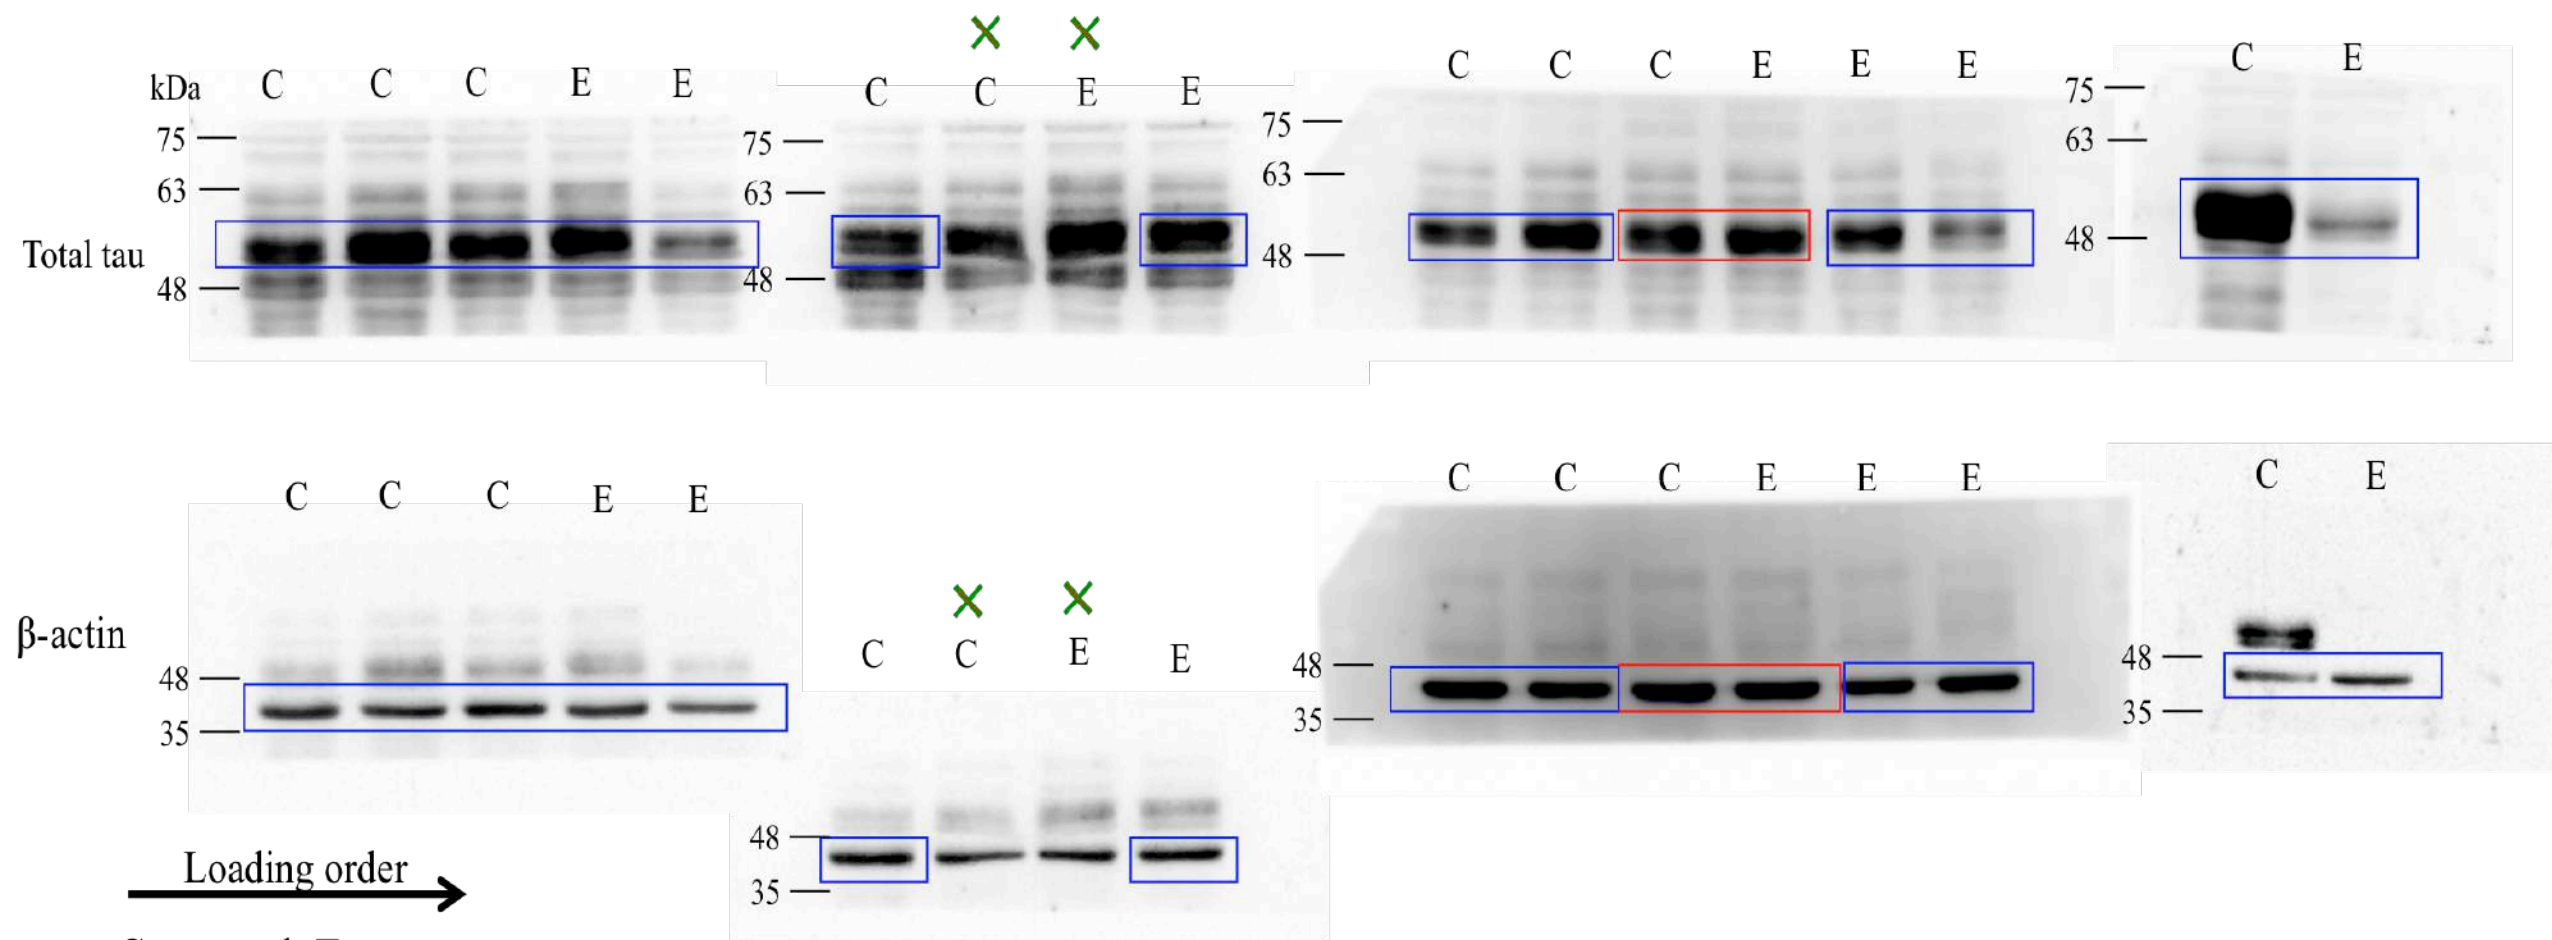

C: control; E: exposure

The **selected area** were used in the statistics and **shown** in the manuscript as the representative images

The **selected area** were used in the statistics, but the images were **not shown** in the manuscript

**X** were **not used** in the statistics and **not shown** in the manuscript

# ECL images in the **Olfactory bulb**

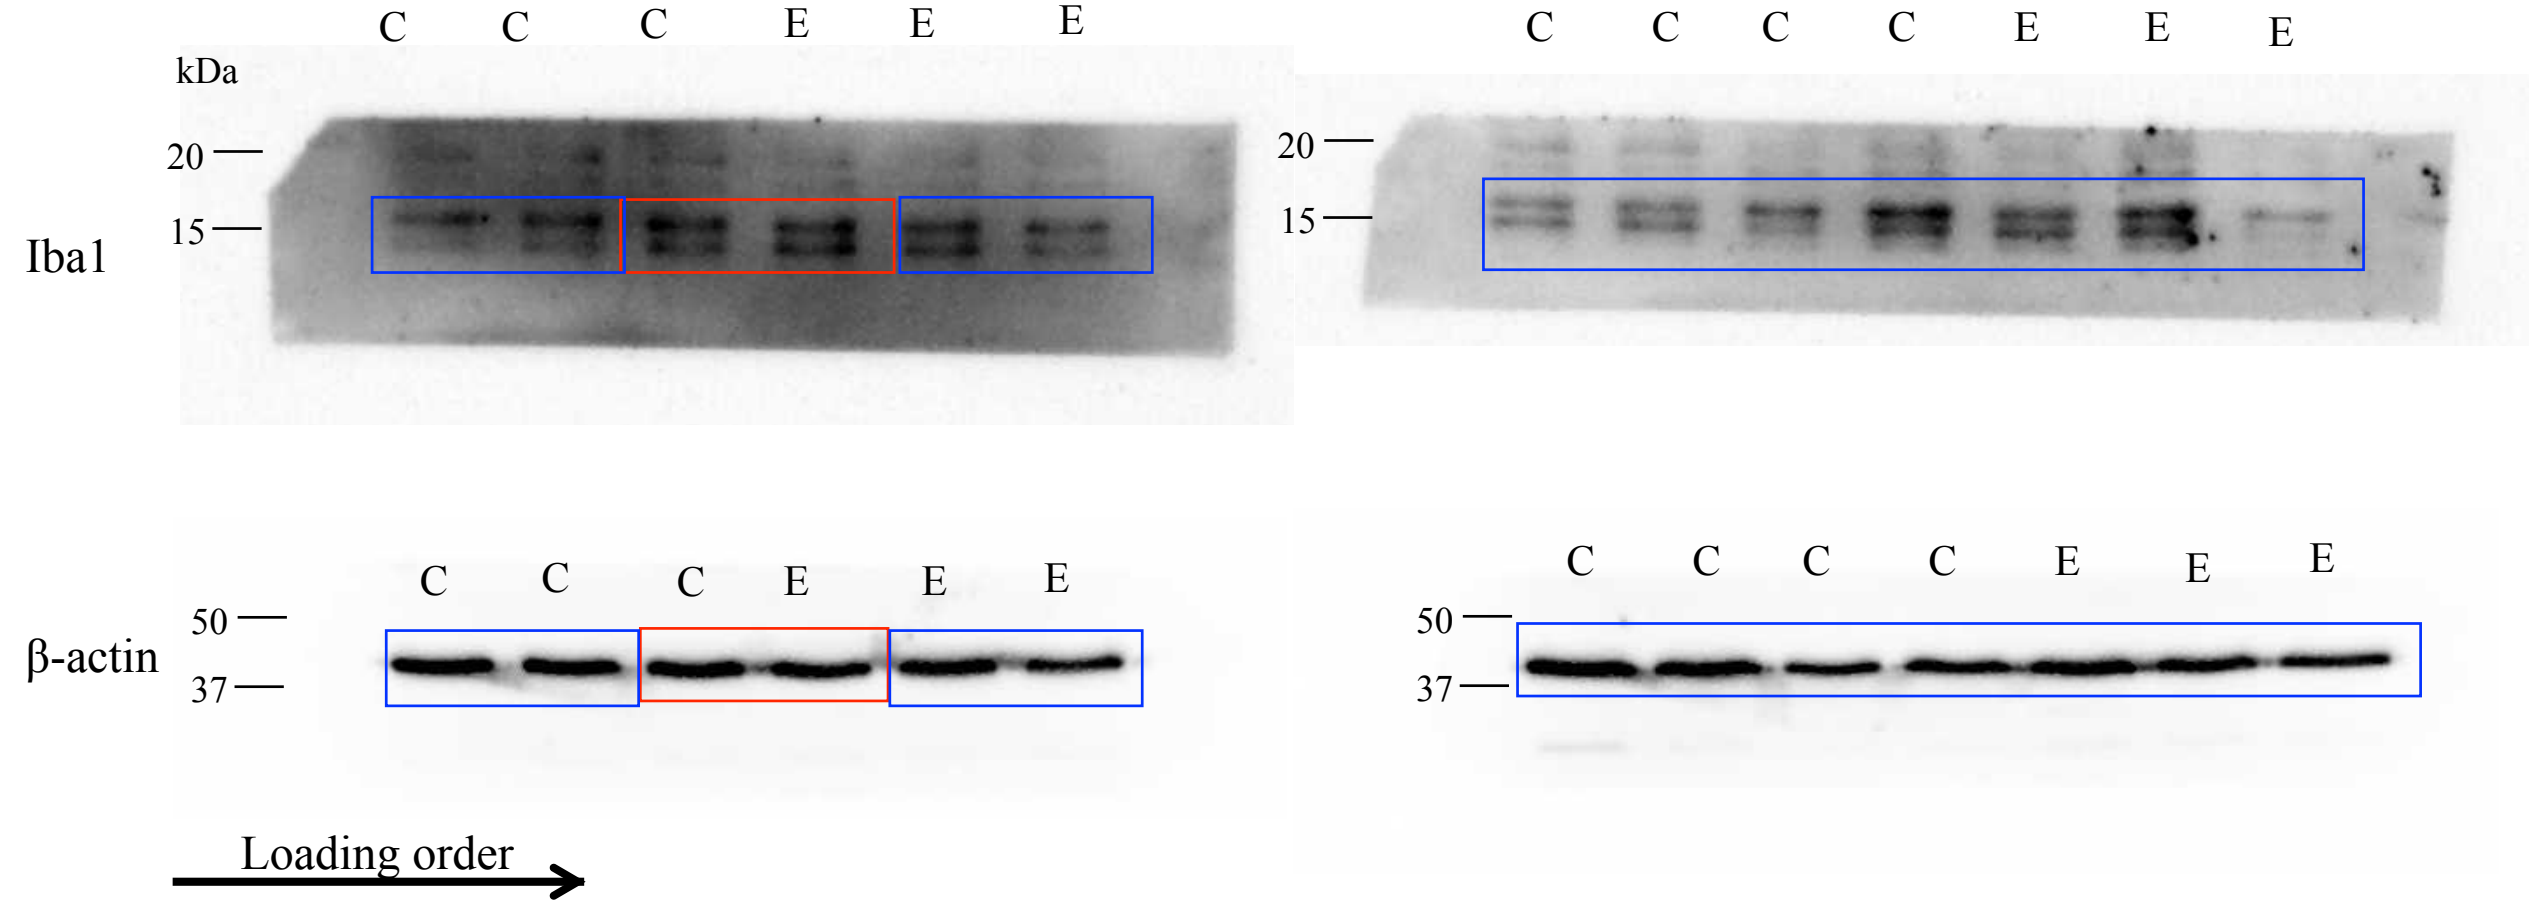

C: control; E: exposure

The **selected area** were used in the statistics and **shown** in the manuscript as the representative images

The **selected area** were used in the statistics, but the images were **not shown** in the manuscript

# ECL images in the **Hippocampus**

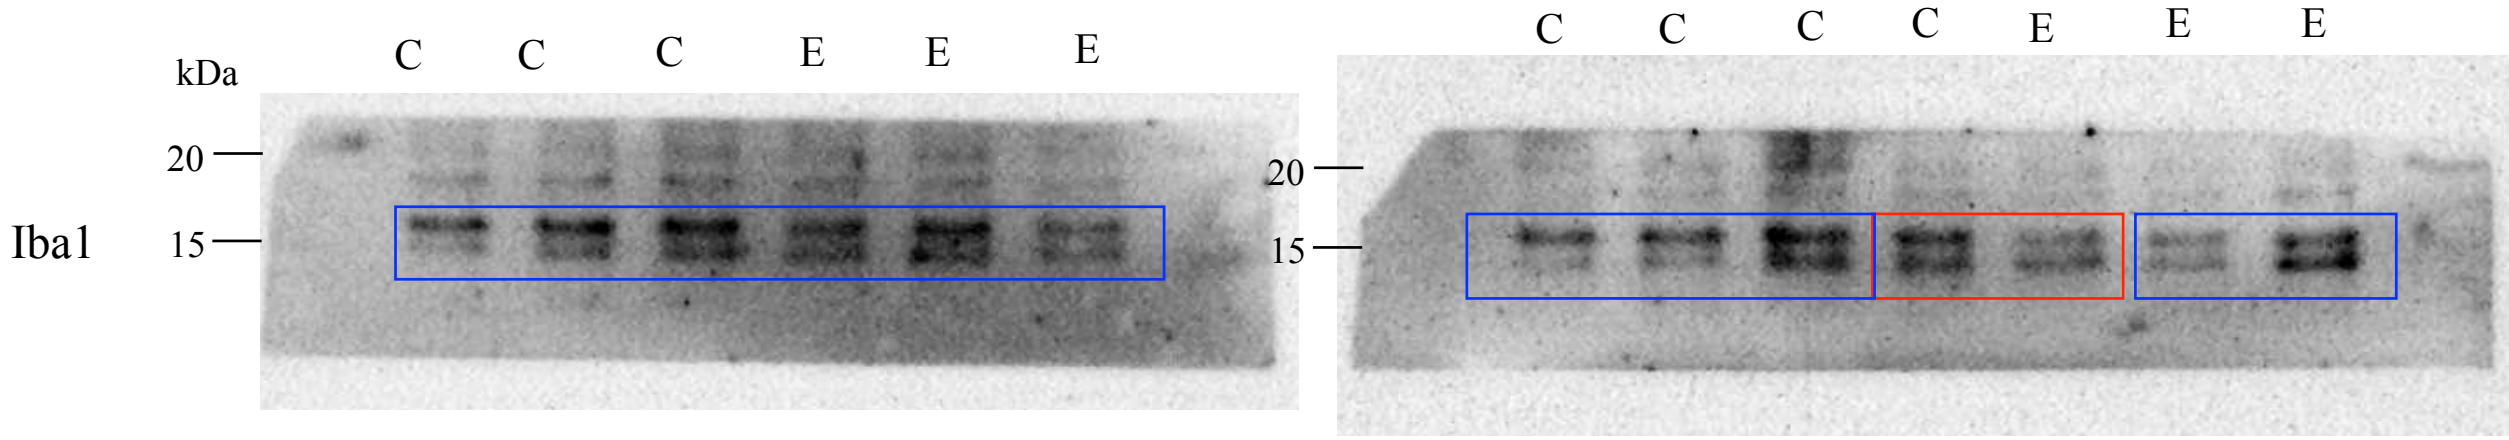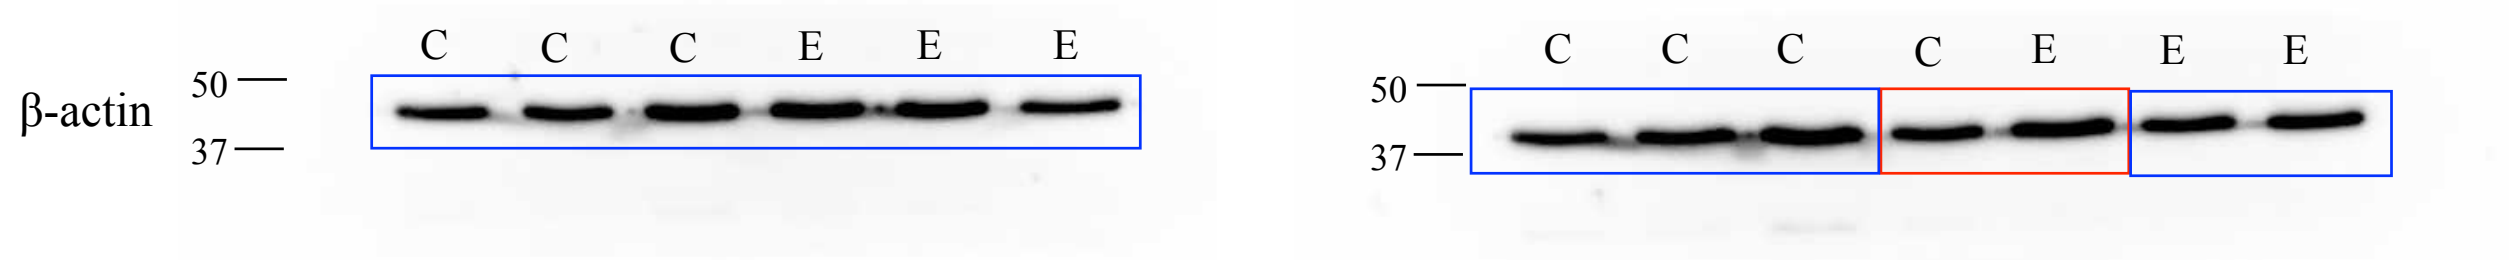

→ Loading order →

C: control; E: exposure

The **selected area** were used in the statistics and **shown** in the manuscript as the representative images  
The **selected area** were used in the statistics, but the images were **not shown** in the manuscript

# ECL images in the Cerebral cortex

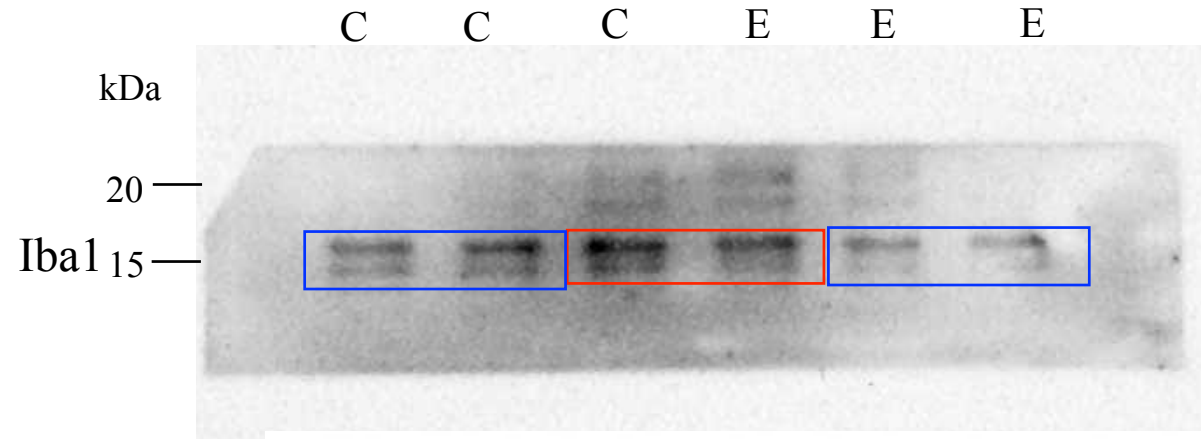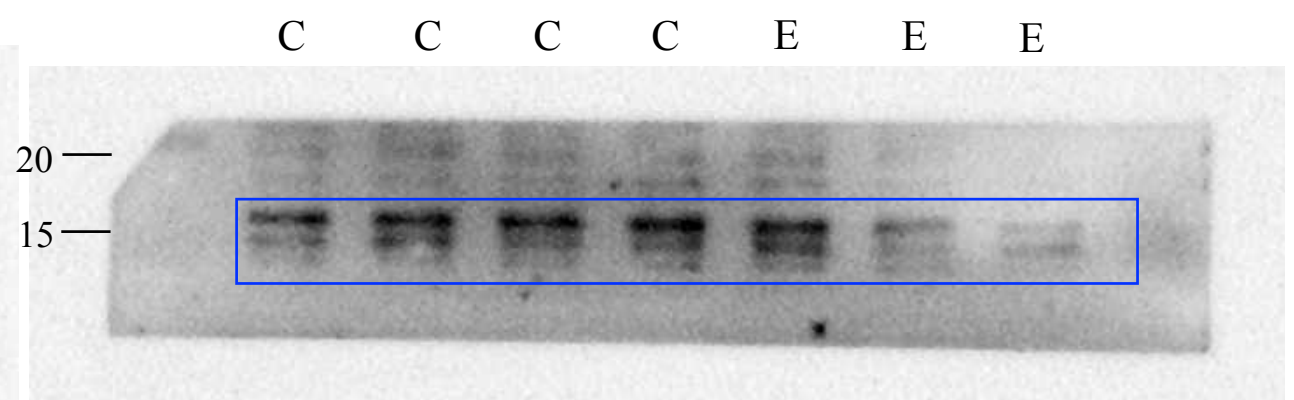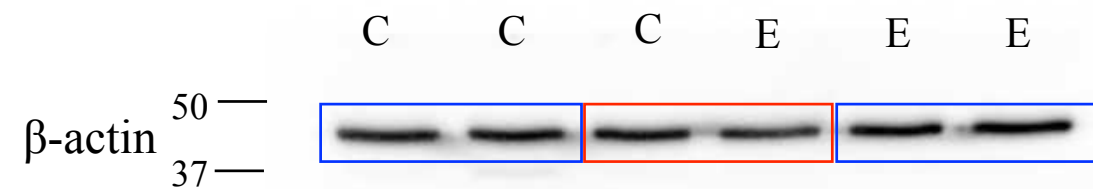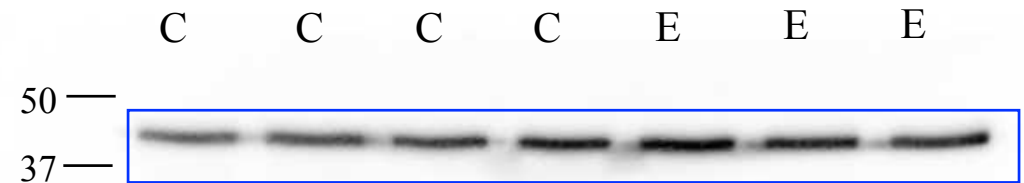

Loading order →

C: control; E: exposure

The **selected area** were used in the statistics and **shown** in the manuscript as the representative images

The **selected area** were used in the statistics, but the images were **not shown** in the manuscript

# ECL images in the Cerebellum

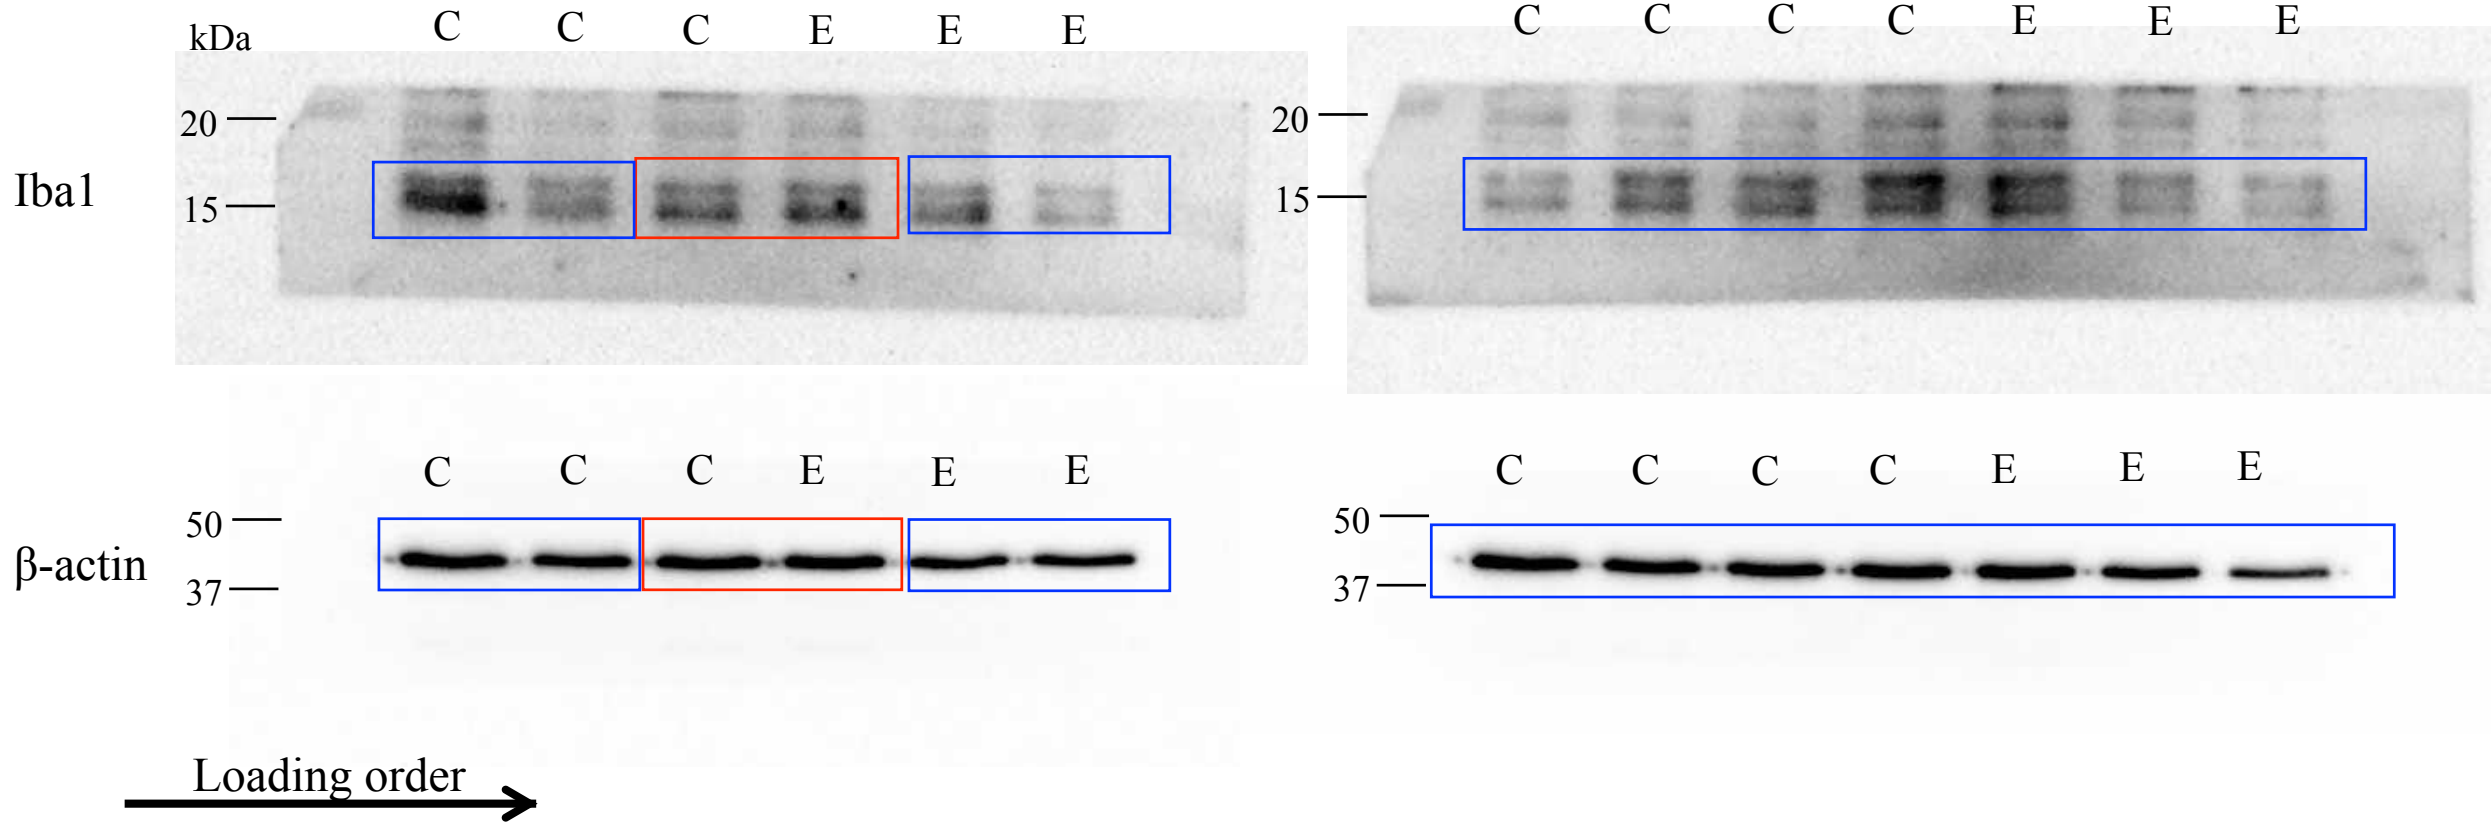

C: control; E: exposure

The **selected area** were used in the statistics and **shown** in the manuscript as the representative images

The **selected area** were used in the statistics, but the images were **not shown** in the manuscript



# ECL images in the **Olfactory bulb**

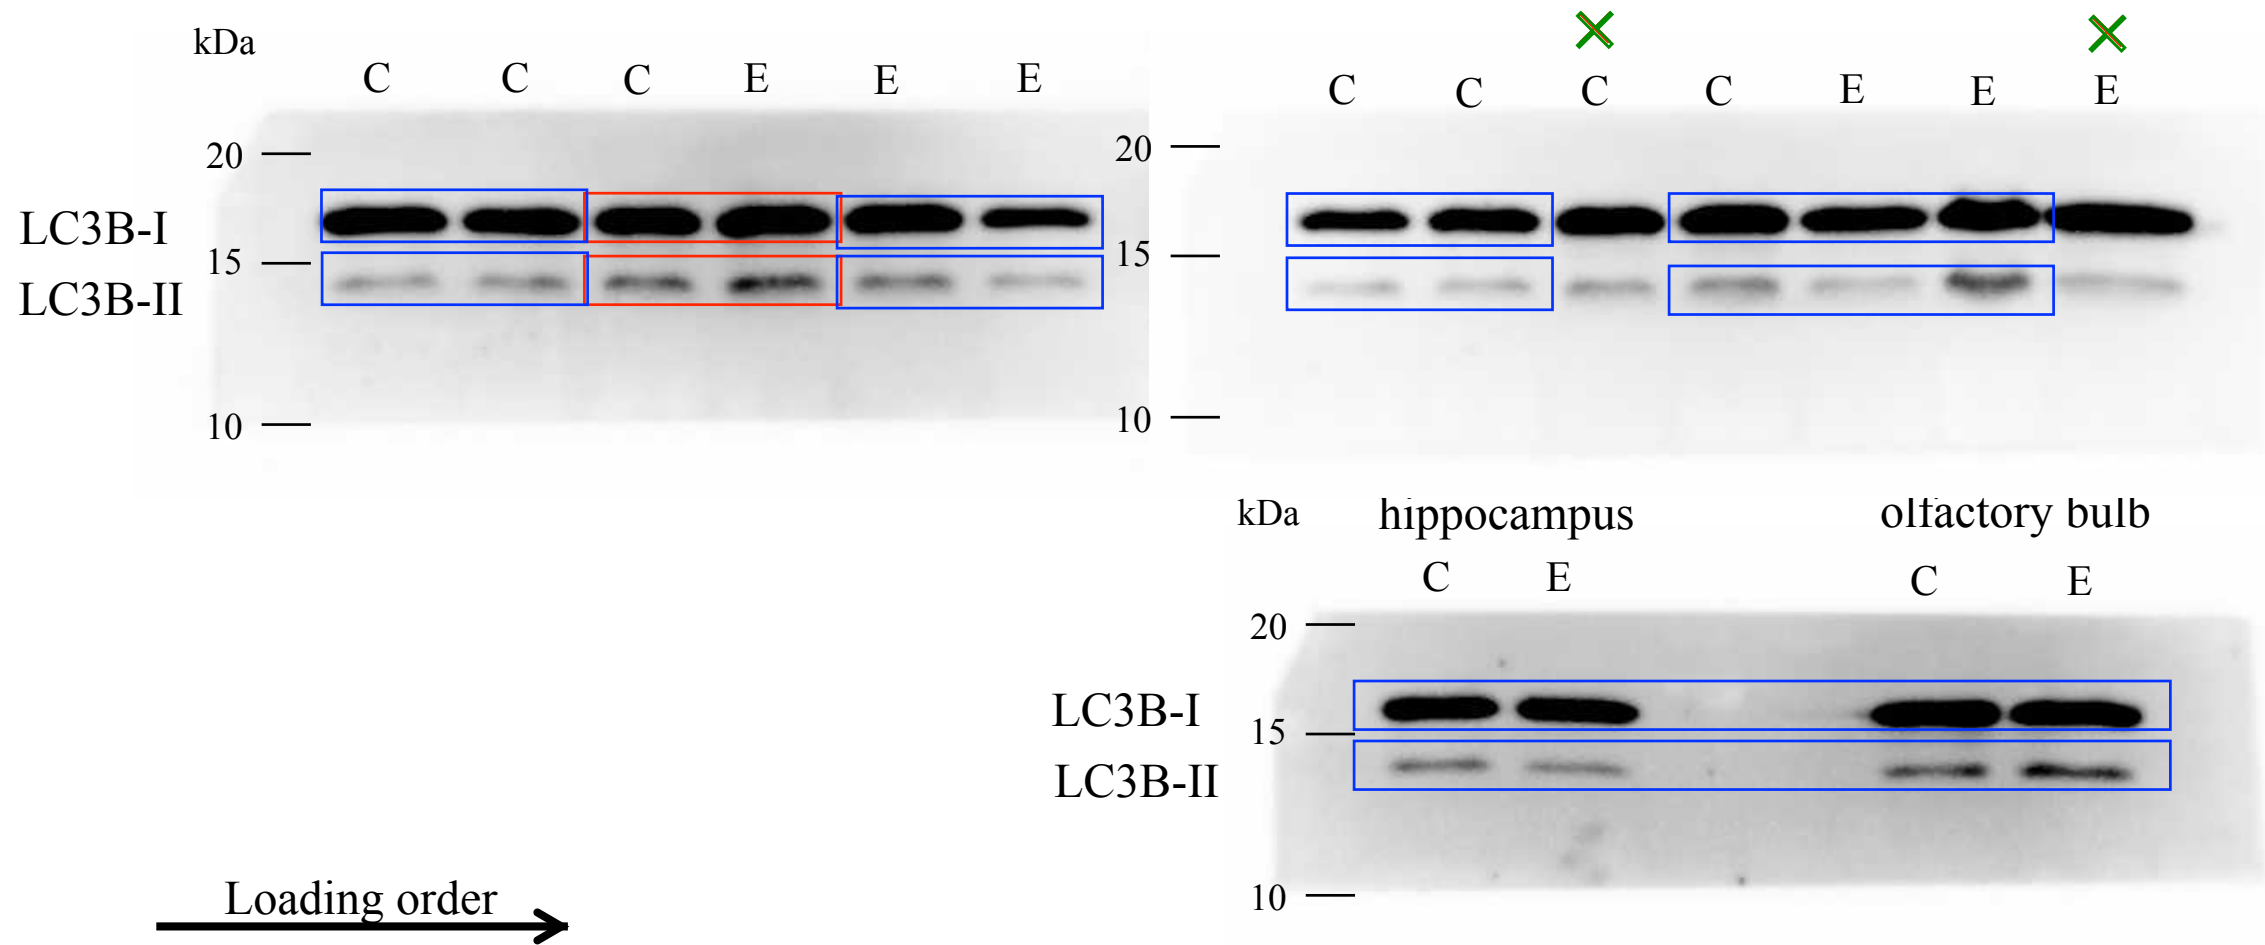

→ Loading order

C: control; E: exposure

The **selected area** were used in the statistics and **shown** in the manuscript as the representative images

The **selected area** were used in the statistics, but the images were **not shown** in the manuscript

**X** were **not used** in the statistics and **not shown** in the manuscript

# ECL images in the **Hippocampus**

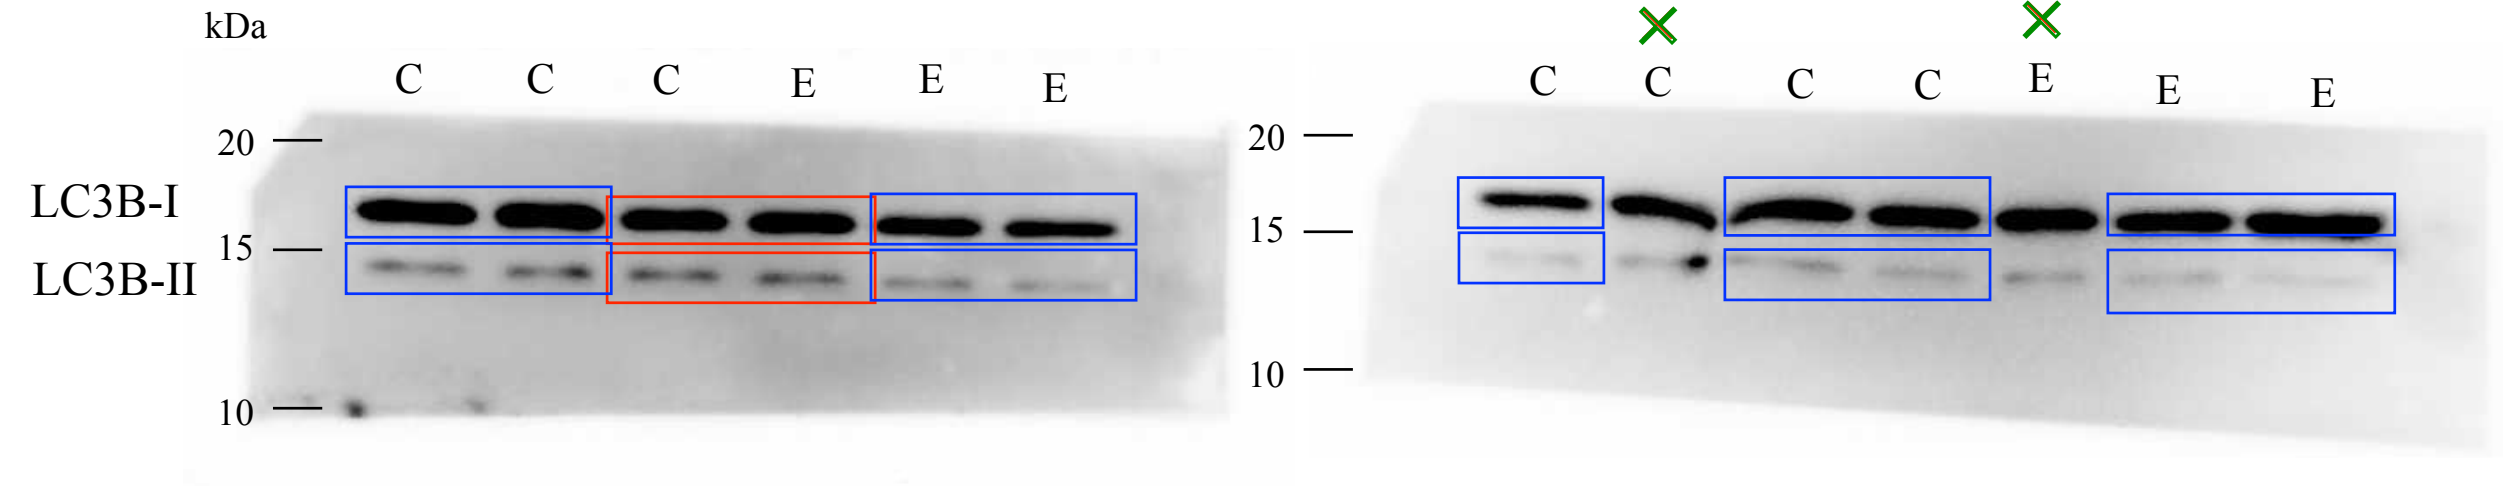

→ Loading order →

C: control; E: exposure

The **selected area** were used in the statistics and **shown** in the manuscript as the representative images

The **selected area** were used in the statistics, but the images were **not shown** in the manuscript

**X** were **not used** in the statistics and **not shown** in the manuscript

## ECL images in the Cerebral cortex

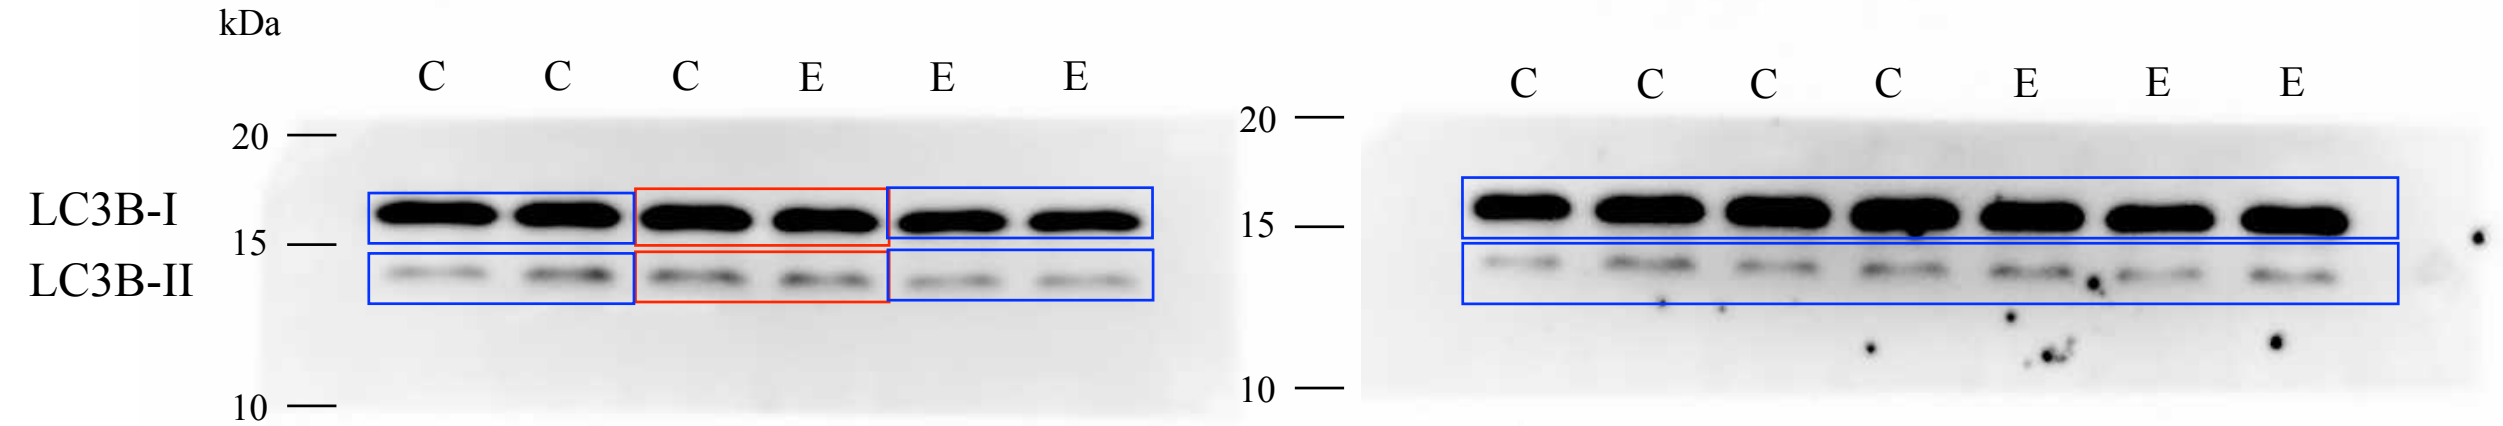

Loading order →

C: control; E: exposure

The **selected area** were used in the statistics and **shown** in the manuscript as the representative images

The **selected area** were used in the statistics, but the images were **not shown** in the manuscript

## ECL images in the Cerebellum

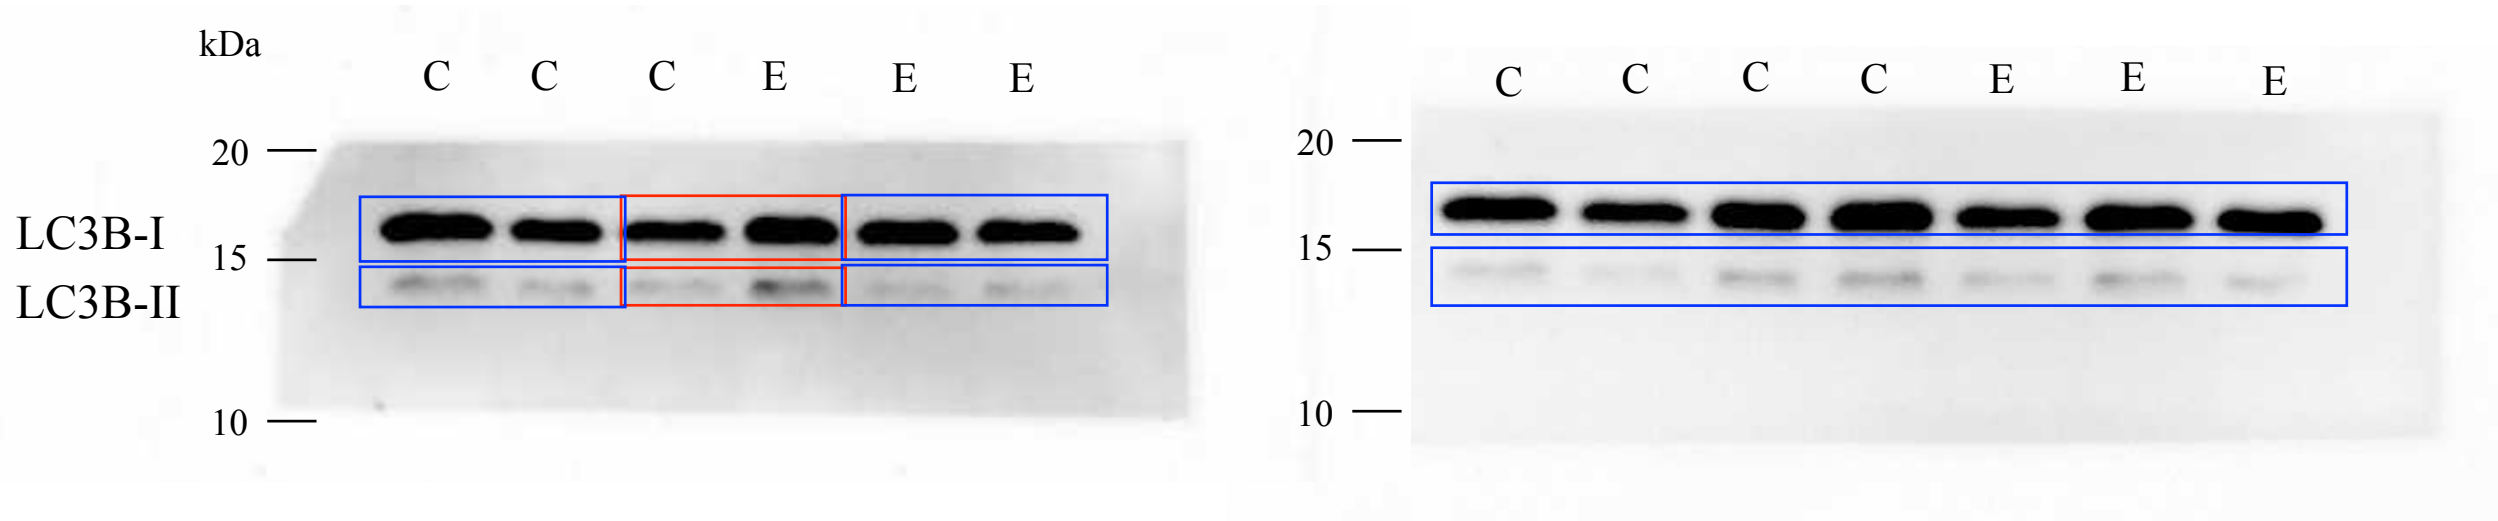

Loading order →

C: control; E: exposure

The **selected area** were used in the statistics and **shown** in the manuscript as the representative images

The **selected area** were used in the statistics, but the images were **not shown** in the manuscript
